# Supplementary material for: Antibiofilm Activity of Phorbaketals from the Marine Sponge Phorbas sp. against Staphylococcus aureus
Source: MDPI journal article supplement (doi:10.3390/md19060301), 2021-05-24
Supplement: s1 [file s1]

**Antibiofilm activity of Phorbaketals from the Marine Sponge *Phorbas* sp.  
against *Staphylococcus aureus***

**Contents**

|                                                                                           |    |
|-------------------------------------------------------------------------------------------|----|
| Characterization data                                                                     | 2  |
| Figure S1. The <sup>1</sup> H NMR NMR spectrum of phorbaketal A acetate ( <b>2</b> )      | 4  |
| Figure S2. The <sup>13</sup> C NMR NMR spectrum of phorbaketal A acetate ( <b>2</b> )     | 5  |
| Figure S3. The COSY NMR spectrum of phorbaketal A acetate ( <b>2</b> )                    | 6  |
| Figure S4. The HSQC NMR spectrum of phorbaketal A acetate ( <b>2</b> )                    | 7  |
| Figure S5. The HMBC NMR spectrum of phorbaketal A acetate ( <b>2</b> )                    | 8  |
| Figure S6. The ROESY NMR spectrum of phorbaketal A acetate ( <b>2</b> )                   | 9  |
| Figure S7. The HR-ESIMS spectrum of phorbaketal A acetate ( <b>2</b> )                    | 10 |
| Figure S8. The <sup>1</sup> H NMR NMR spectrum of phorbaketal B acetate ( <b>4</b> )      | 11 |
| Figure S9. The <sup>13</sup> C NMR NMR spectrum of phorbaketal B acetate ( <b>4</b> )     | 12 |
| Figure S10. The COSY NMR spectrum of phorbaketal B acetate ( <b>4</b> )                   | 13 |
| Figure S11. The HSQC NMR spectrum of phorbaketal B acetate ( <b>4</b> )                   | 14 |
| Figure S12. The HMBC NMR spectrum of phorbaketal B acetate ( <b>4</b> )                   | 15 |
| Figure S13. The ROESY NMR spectrum of phorbaketal B acetate ( <b>4</b> )                  | 16 |
| Figure S14. The HR-ESIMS spectrum of phorbaketal B acetate ( <b>4</b> )                   | 17 |
| Figure S15. The <sup>1</sup> H NMR NMR spectrum of phorbaketal C acetate ( <b>6</b> )     | 18 |
| Figure S16. The <sup>13</sup> C NMR NMR spectrum of phorbaketal C acetate ( <b>6</b> )    | 19 |
| Figure S17. The COSY NMR spectrum of phorbaketal C acetate ( <b>6</b> )                   | 20 |
| Figure S18. The HSQC NMR spectrum of phorbaketal C acetate ( <b>6</b> )                   | 21 |
| Figure S19. The HMBC NMR spectrum of phorbaketal C acetate ( <b>6</b> )                   | 22 |
| Figure S20. The HR-ESIMS spectrum of phorbaketal C acetate ( <b>6</b> )                   | 23 |
| Figure S21. Planktonic cell growth in the presence of phorbaketals                        | 24 |
| Table S1. <sup>1</sup> H and <sup>13</sup> C NMR data of <b>2</b> , <b>4</b> and <b>6</b> | 25 |
| Table S2. Sequences of the primers used for qRT-PCR                                       | 26 |

## Characterization data

**Phorbaketal A (1).** Yellow oil.  $[\alpha]^{25}_{\text{D}} -118.1$  (*c* 0.15, MeOH). IR (film)  $\nu_{\text{max}}$ : 3434, 2914, 1681, 983  $\text{cm}^{-1}$ .  $^1\text{H}$  NMR (500 MHz, methanol-*d*4)  $\delta$  6.68 (dd, 1H, *J* = 5.5, 1.2 Hz, H-2), 5.54 (br s, 1H, H-10), 5.28 (br s, 1H, H-12), 5.22 (br s, 1H, H-17), 5.12 (br t, 1H, H-22), 4.74 (ddd, 1H, *J* = 11.3, 8.1, 3.4 Hz, H-16), 4.49 (dd, 1H, *J* = 5.5, 3.3 Hz, H-1), 4.07 (d, 1H, *J* = 14.7 Hz, H-9b), 4.03 (d, 1H, *J* = 14.7 Hz, H-9a), 2.59 (ddd, 1H, *J* = 13.7, 3.9, 3.4, H-7), 2.58 (dd, 1H, *J* = 16.1, 3.9 Hz, H-6b), 2.43 (dd, 1H, *J* = 16.1, 13.7 Hz, H-6a), 2.13 (m, 2H, H-21), 2.05 (m, 2H, H-20), 1.81 (s, 3H, H-4), 1.77 (s, 3H, H-19), 1.75 (s, 3H, H-14), 1.68 (s, 3H, H-24), 1.61 (s, 3H, H-25);  $^{13}\text{C}$  NMR (125 MHz, methanol-*d*4)  $\delta$  202.7 (C-5), 143.7 (C-8), 142.0 (C-18), 141.6 (C-2), 139.5 (C-3), 138.7 (C-13), 132.6 (C-23), 125.8 (C-17), 125.0 (C-22), 124.7 (C-10), 123.0 (C-12), 96.1 (C-11), 66.9 (C-16), 64.7 (C-1), 63.8 (C-9), 40.6 (C-20), 38.8 (C-6), 36.4 (C-15), 34.7 (C-7), 27.5 (C-21), 25.9 (C-24), 22.8 (C-14), 17.8 (C-25), 16.9 (C-19), 15.9 (C-4);  $[\alpha]^{25}_{\text{D}} -118.2$  (*c* 0.15, MeOH); HRESIMS (positive-ion mode) *m/z*: 399.2535  $[\text{M} + \text{H}]^+$  (Calcd for  $\text{C}_{25}\text{H}_{35}\text{O}_4$ , 399.2530).

**9-Acethylphorbaketal A (2).** Yellow oil.  $[\alpha]^{25}_{\text{D}} -63.9$  (*c* 0.15, MeOH). UV (MeOH)  $\lambda_{\text{max}}$  (log  $\epsilon$ ): 203 (4.4), 229 (3.9) nm. IR (film)  $\nu_{\text{max}}$ : 2921, 1743, 1682, 1225, 987  $\text{cm}^{-1}$ .  $^1\text{H}$  (500 MHz) and  $^{13}\text{C}$  (125 MHz) NMR data, see Table 1. HRESIMS (positive-ion mode) *m/z*: 463.2460  $[\text{M} + \text{Na}]^+$  (Calcd for  $\text{C}_{27}\text{H}_{36}\text{O}_5\text{Na}$ , 463.2455).

**Phorbaketal B (3).** Yellow oil.  $[\alpha]^{25}_{\text{D}} -115.1$  (*c* 0.1, MeOH). IR (film)  $\nu_{\text{max}}$ : 3388, 2915, 1444, 975  $\text{cm}^{-1}$ .  $^1\text{H}$  NMR (500 MHz, methanol-*d*4)  $\delta$  5.52 (dq, 1H, *J* = 5.1, 1.6 Hz, H-2), 5.49 (dd, 1H, *J* = 1.5, 1.2 Hz, H-10), 5.23 (br s, 1H, H-12), 5.20 (dq, 1H, *J* = 8.2, 1.3 Hz, H-17), 5.11 (br t, 1H, *J* = 7.1 Hz, H-22), 4.72 (ddd, 1H, *J* = 11.3, 8.2, 3.3 Hz, H-16), 4.24 (m, 1H, H-1), 4.09 (dd, 1H, *J* = 13.9, 1.2 Hz, H-9b), 4.05 (dd, 1H, *J* = 13.9, 1.5 Hz, H-9a), 4.04 (br d, 1H, *J* = 10.3 Hz, H-5), 2.08 (m, 1H, H-7), 2.06 (m, 1H, H-6b), 1.51 (ddd, 1H, *J* = 12.5, 11.5, 10.3 Hz, H-6a), 2.12 (m, 2H, H-21), 2.04 (m, 2H, H-20), 2.00 (dd, 1H, *J* = 17.2, 11.3 Hz, H-15a), 1.82 (dd, 1H, *J* = 17.2, 3.3 Hz, H-15b), 1.82 (s, 3H, H-4), 1.75 (s, 3H, H-19), 1.74 (s, 3H, H-14), 1.67 (s, 3H, H-24), 1.61 (s, 3H, H-25);  $^{13}\text{C}$  NMR (125 MHz, methanol-*d*4)  $\delta$  145.7 (C-3), 144.4 (C-8), 142.1 (C-18), 138.2 (C-13), 132.5 (C-23), 125.8 (C-17), 125.0 (C-22), 124.4 (C-10), 123.7 (C-12), 123.2 (C-2), 95.6 (C-11), 70.7 (C-5), 66.6 (C-16), 65.6 (C-1), 63.9 (C-9), 40.6 (C-20), 36.4 (C-15), 34.4 (C-7), 33.0 (C-6), 27.5 (C-21), 25.9 (C-24), 22.9 (C-14), 19.4 (C-4), 17.8 (C-25), 16.8 (C-19);  $[\alpha]^{25}_{\text{D}} -115.1$  (*c* 0.1, MeOH); HRESIMS (positive-ion mode) *m/z*: 423.2501  $[\text{M} + \text{Na}]^+$  (Calcd for  $\text{C}_{25}\text{H}_{36}\text{O}_4\text{Na}$ , 423.2506).

**5-Acethylphorbaketal B (4).** Yellow oil.  $[\alpha]^{25}_{\text{D}} -148.7$  (*c* 0.1, MeOH). UV (MeOH)  $\lambda_{\text{max}}$  (log  $\epsilon$ ): 203 (4.4) nm. IR (film)  $\nu_{\text{max}}$ : 2917, 1735, 1238, 980  $\text{cm}^{-1}$ .  $^1\text{H}$  (500 MHz) and  $^{13}\text{C}$  (125 MHz) NMR data, see Table 1. HRESIMS (positive-ion mode) *m/z*: 465.2603  $[\text{M} + \text{Na}]^+$  (Calcd for  $\text{C}_{25}\text{H}_{38}\text{O}_5\text{Na}$ , 465.2611).

**Phorbaketal C (5).** Yellow oil.  $[\alpha]^{25}_{\text{D}} -122.3$  (*c* 0.1, MeOH). IR (film)  $\nu_{\text{max}}$ : 3378, 2918, 1443, 985  $\text{cm}^{-1}$ .  $^1\text{H}$  NMR (500 MHz, methanol-*d*4)  $\delta$  5.58 (br d, 1H, *J* = 5.4 Hz, H-2), 5.51 (d, 1H, *J* = 1.2 Hz, H-10), 5.23 (br s, 1H, H-12), 5.21 (d, 1H, *J* = 8.3 Hz, H-17), 5.11 (br t, 1H, *J* = 7.1 Hz, H-22), 4.72 (ddd, 1H, *J* = 11.3, 8.3, 3.4 Hz, H-16), 4.28 (m, 1H, H-1), 4.08 (d, 2H, *J* = 1.2 Hz, H-9), 3.97 (dd, 1H, *J* = 3.7, 2.0 Hz, H-5), 2.32 (ddd, *J* = 13.2, 3.4, 3.2 Hz, 1H, H-7), 1.88 (ddd, 1H, *J* = 13.2, 3.2, 2.0 Hz, H-6b), 1.68 (ddd, 1H, *J* = 13.2, 13.2, 3.7 Hz, H-6a), 2.12 (m, 2H, H-21), 2.04 (m, 2H, H-20), 2.00 (dd, 1H, *J* = 17.4, 11.3 Hz, H-15a), 1.83 (dd, 1H, *J* = 17.2, 3.4 Hz, H-15b), 1.86 (s, 3H, H-4), 1.76 (s, 3H, H-19), 1.74 (s, 3H, H-14), 1.67 (s, 3H, H-24), 1.61 (s, 3H, H-25);  $^{13}\text{C}$  NMR (125 MHz, methanol-*d*4)  $\delta$  144.6 (C-8), 142.1 (C-3), 138.2 (C-13), 132.6 (C-23), 125.8 (C-17), 125.0 (C-22), 124.3 (C-2), 124.0 (C-10), 123.7 (C-12), 95.6 (C-11), 68.5 (C-5), 66.7 (C-16), 65.3 (C-1), 63.8 (C-9), 40.6 (C-20), 36.4 (C-15), 32.7 (C-6), 29.7 (C-7), 27.5 (C-21), 25.9 (C-24), 22.8 (C-14), 21.5 (C-4), 17.8 (C-25), 16.8 (C-19);  $[\alpha]^{25}_{\text{D}} -122.3$  (*c* 0.10, MeOH); HRESIMS (positive-ion mode) *m/z*: 423.2503  $[\text{M} + \text{Na}]^+$  (Calcd for  $\text{C}_{25}\text{H}_{36}\text{O}_4\text{Na}$ , 423.2506).

**5-Acethylphorbaketal C (6).** Yellow oil.  $[\alpha]^{25}_{\text{D}} -102.3$  (*c* 0.1, MeOH). UV (MeOH)  $\lambda_{\text{max}}$  (log  $\epsilon$ ): 203 (4.4) nm. IR (film)  $\nu_{\text{max}}$ : 2918, 1736, 1238, 977  $\text{cm}^{-1}$ .  $^1\text{H}$  (500 MHz) and  $^{13}\text{C}$  (125 MHz) NMR data, see Table 1. HRESIMS (positive-ion mode)  $m/z$ : 465.2614  $[\text{M} + \text{Na}]^+$  (Calcd for  $\text{C}_{25}\text{H}_{38}\text{O}_4\text{Na}$ , 465.2611).

phorbaketal\_A'-p.esp

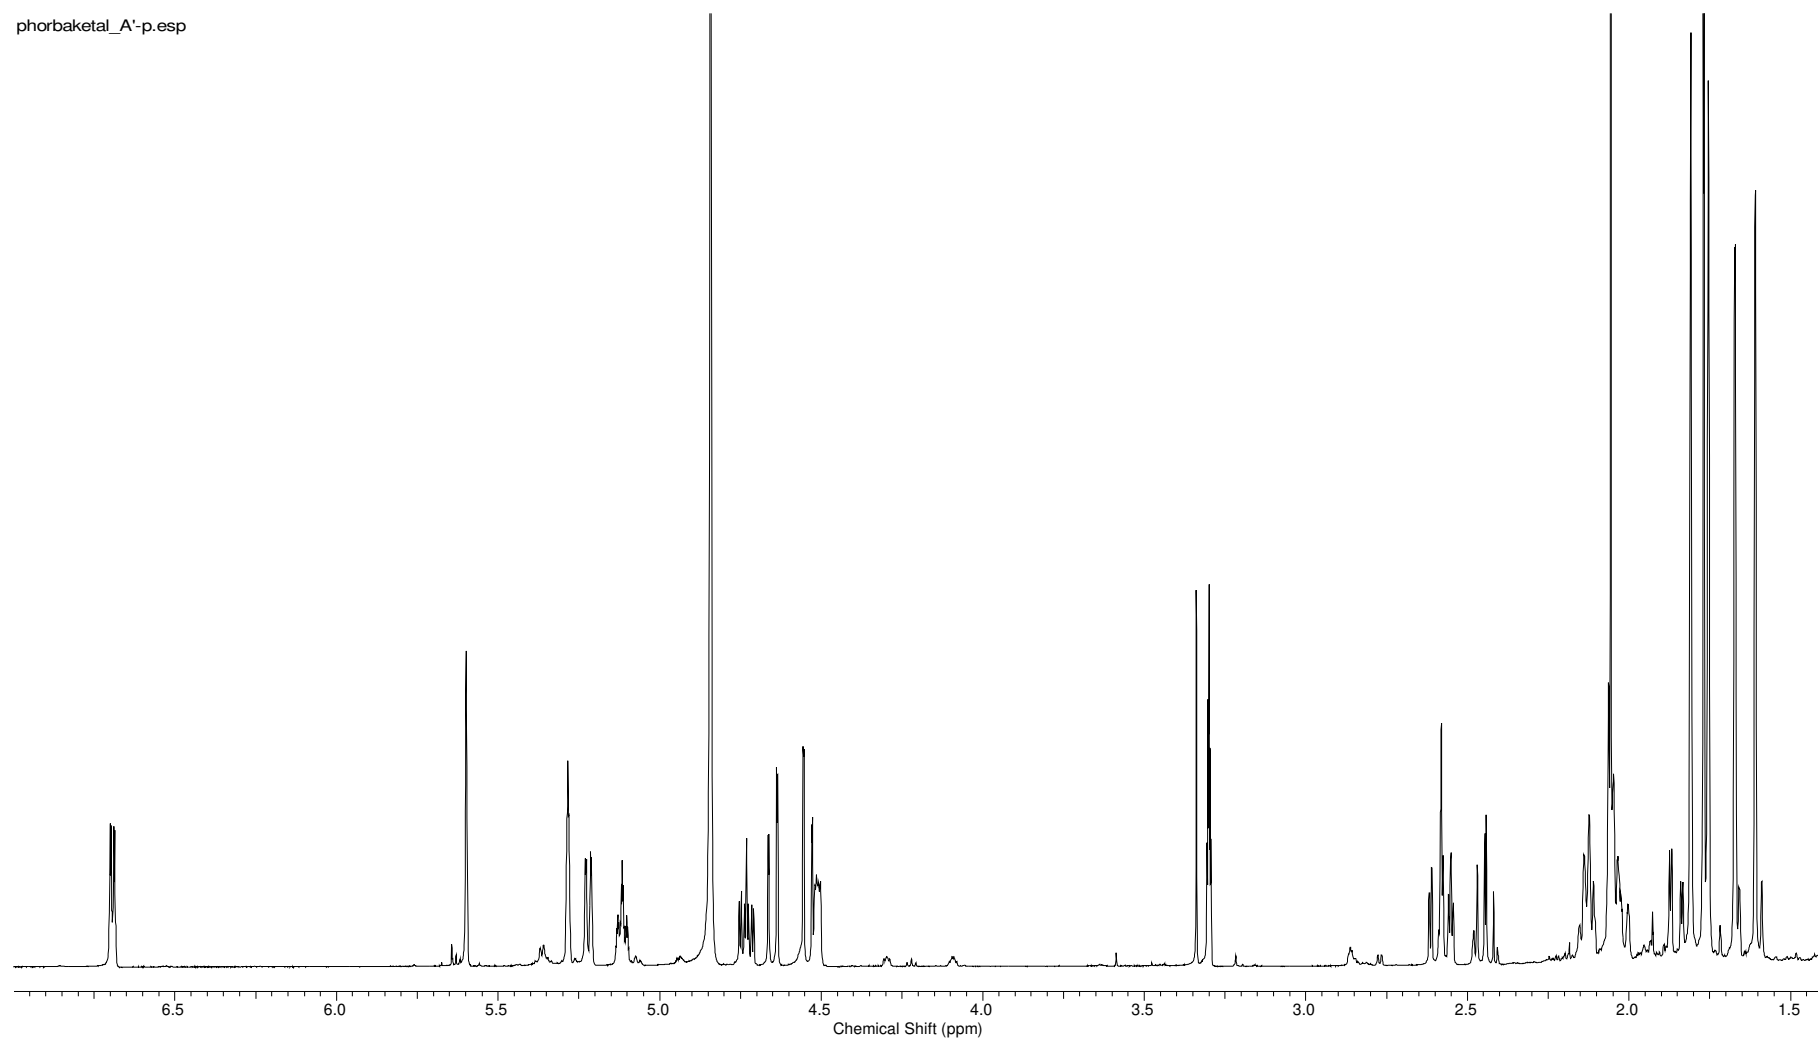

**Figure S1. The  $^1\text{H}$  NMR spectrum of phorbaketal A acetate (2)**

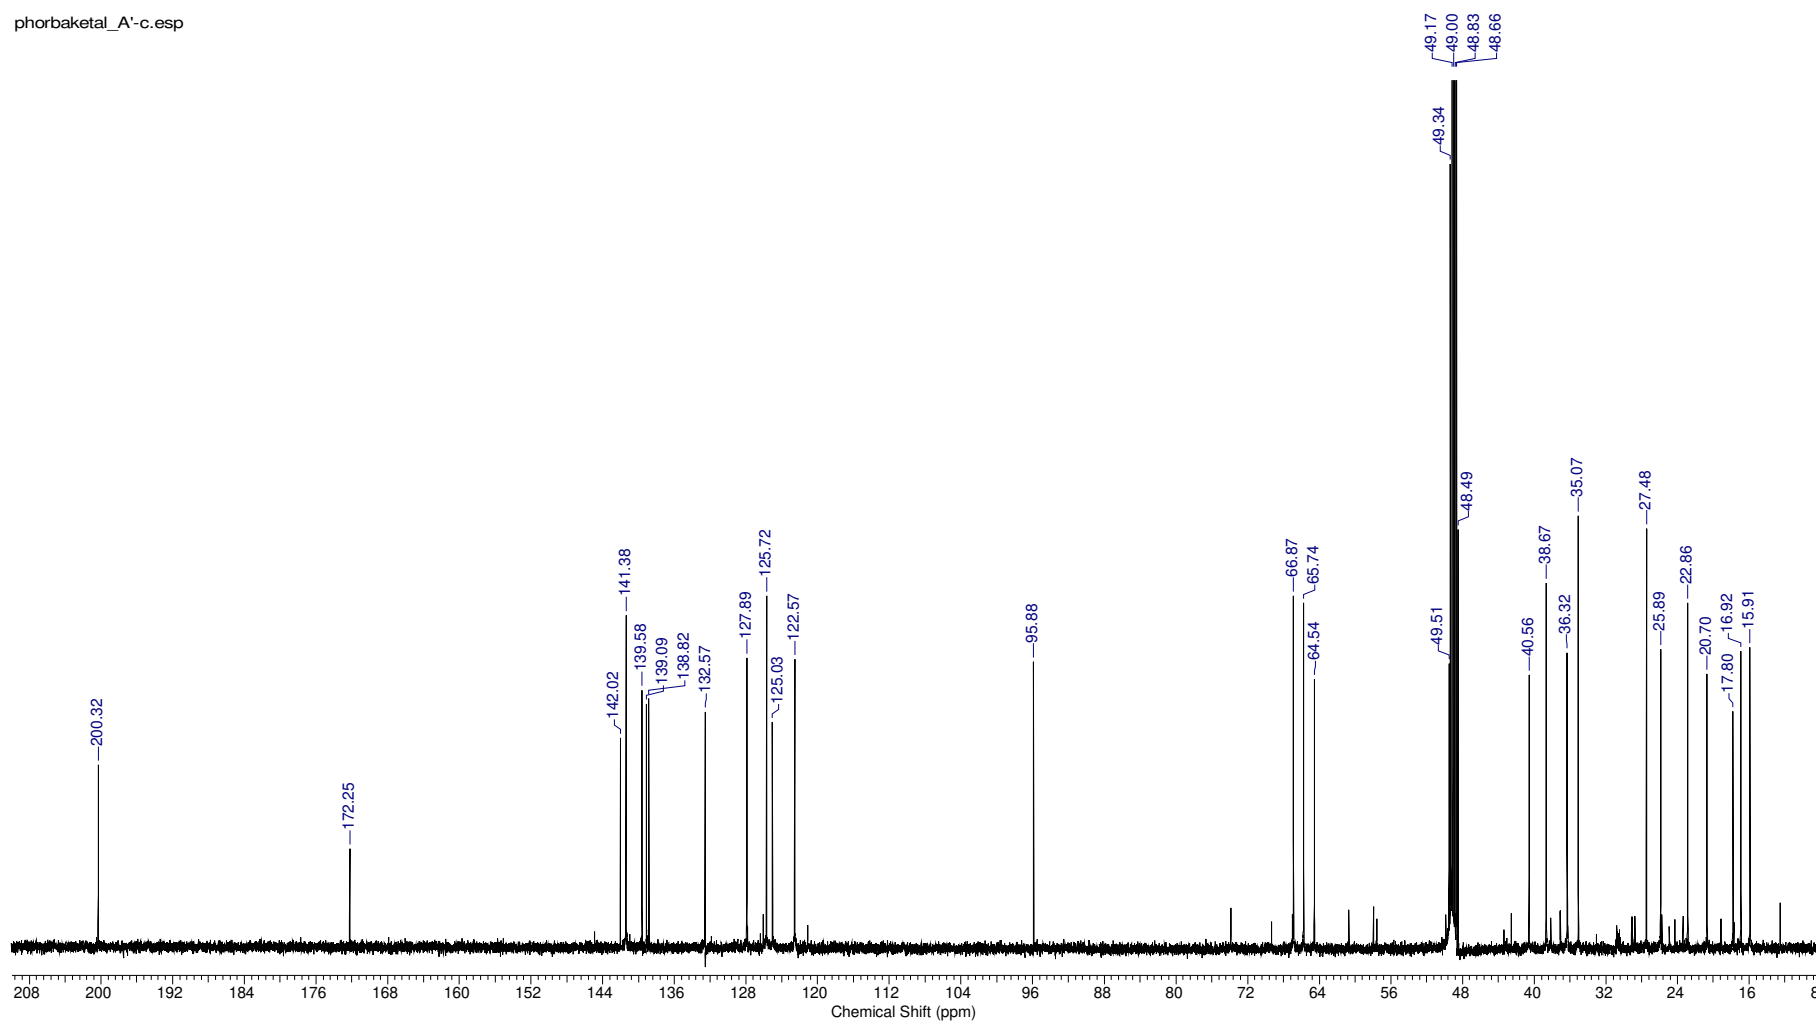

Figure S2. The  $^{13}\text{C}$  NMR spectrum of phorbaketal A acetate (2)

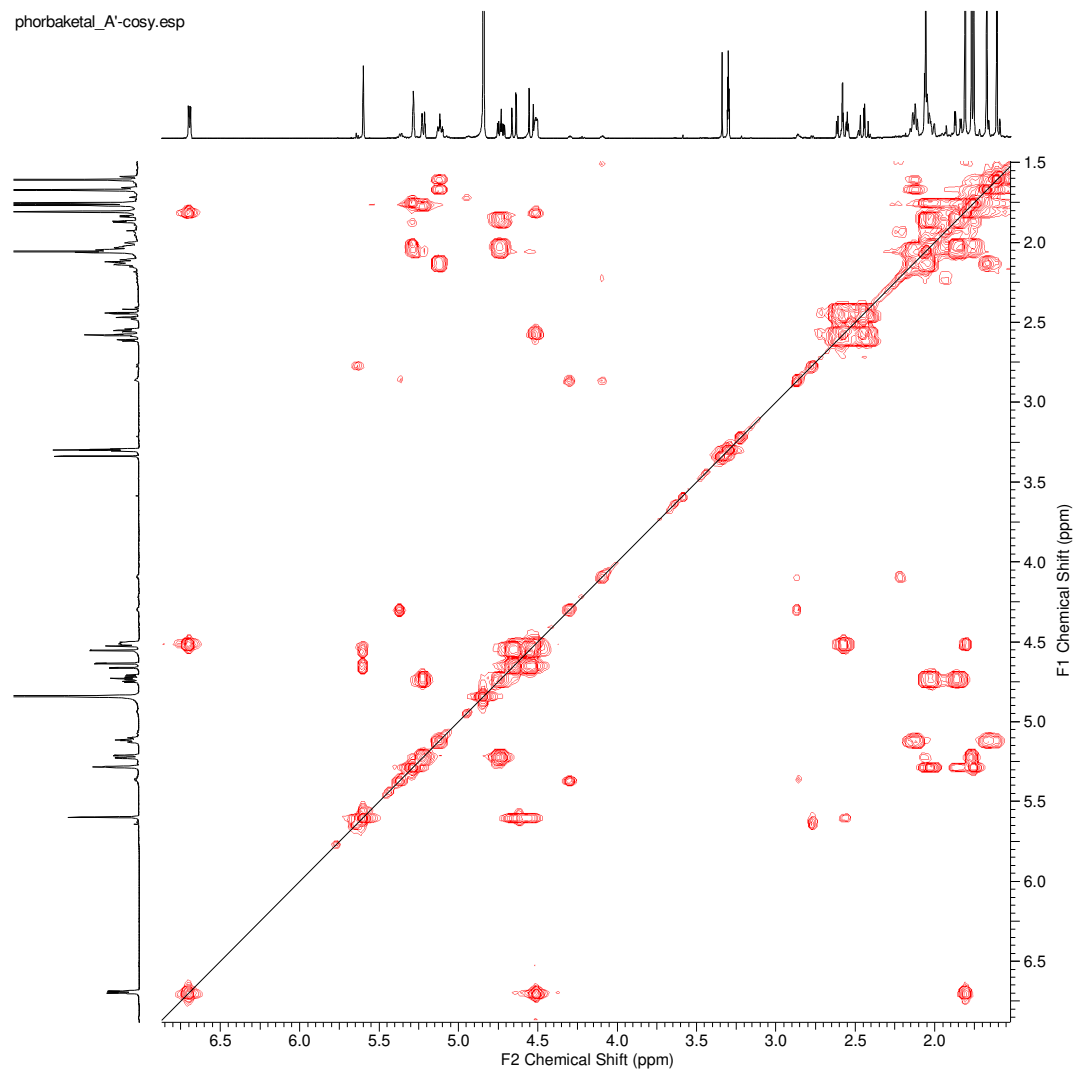

**Figure S3. The COSY NMR spectrum of phorbaketal A acetate (2)**

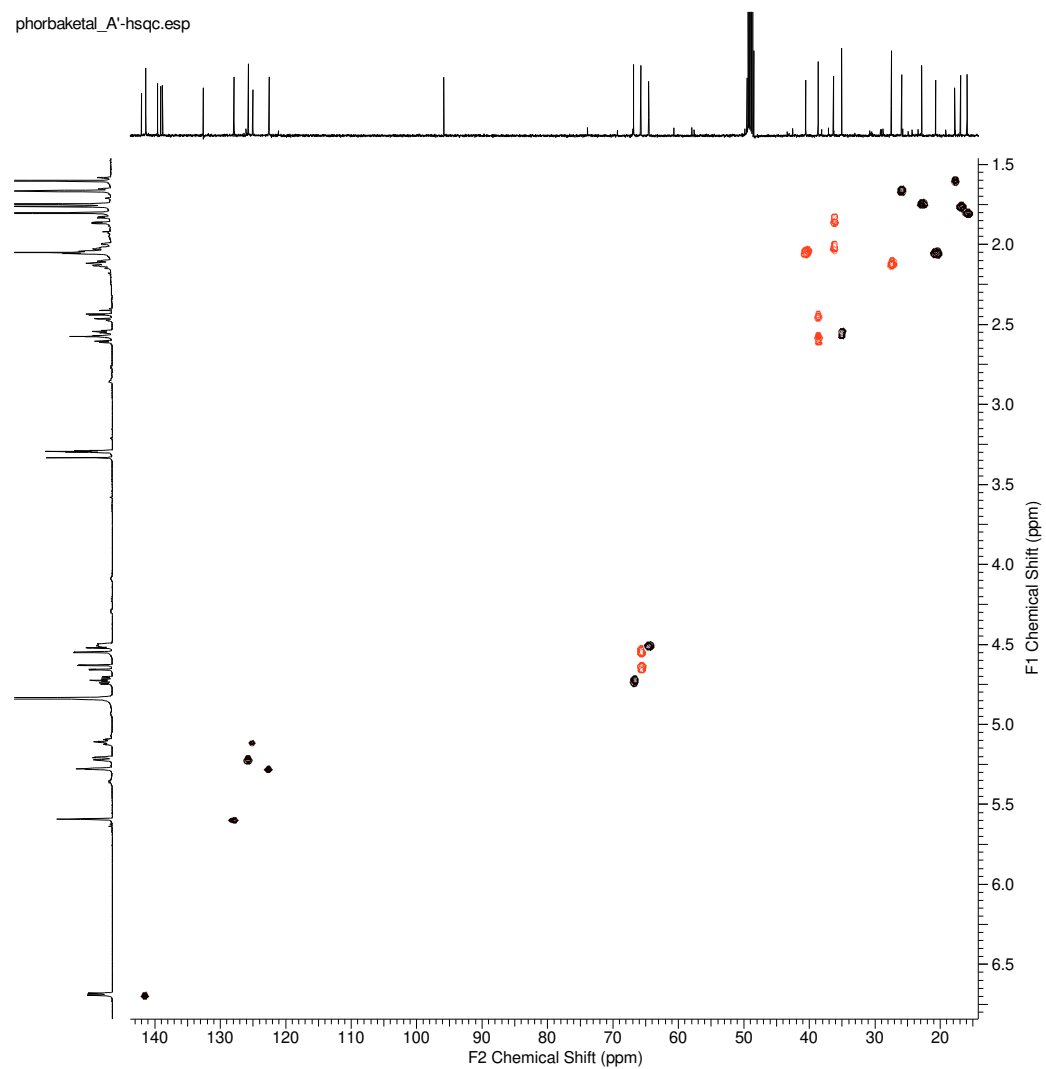

**Figure S4.** The HSQC NMR spectrum of phorbaketel A acetate (2) (red peaks: CH<sub>2</sub>; black peaks: CH)

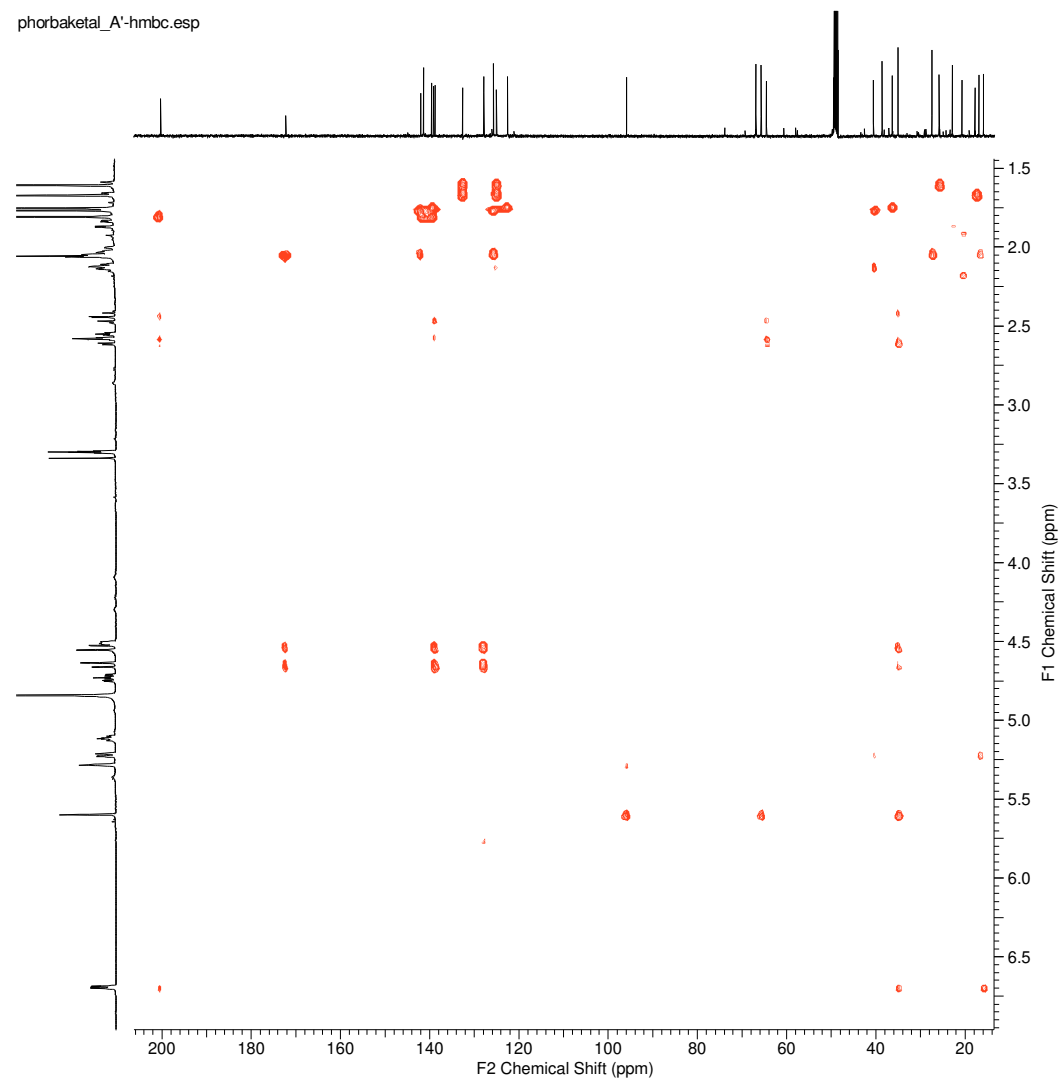

**Figure S5. The HMBC NMR spectrum of phorbaketal A acetate (2)**



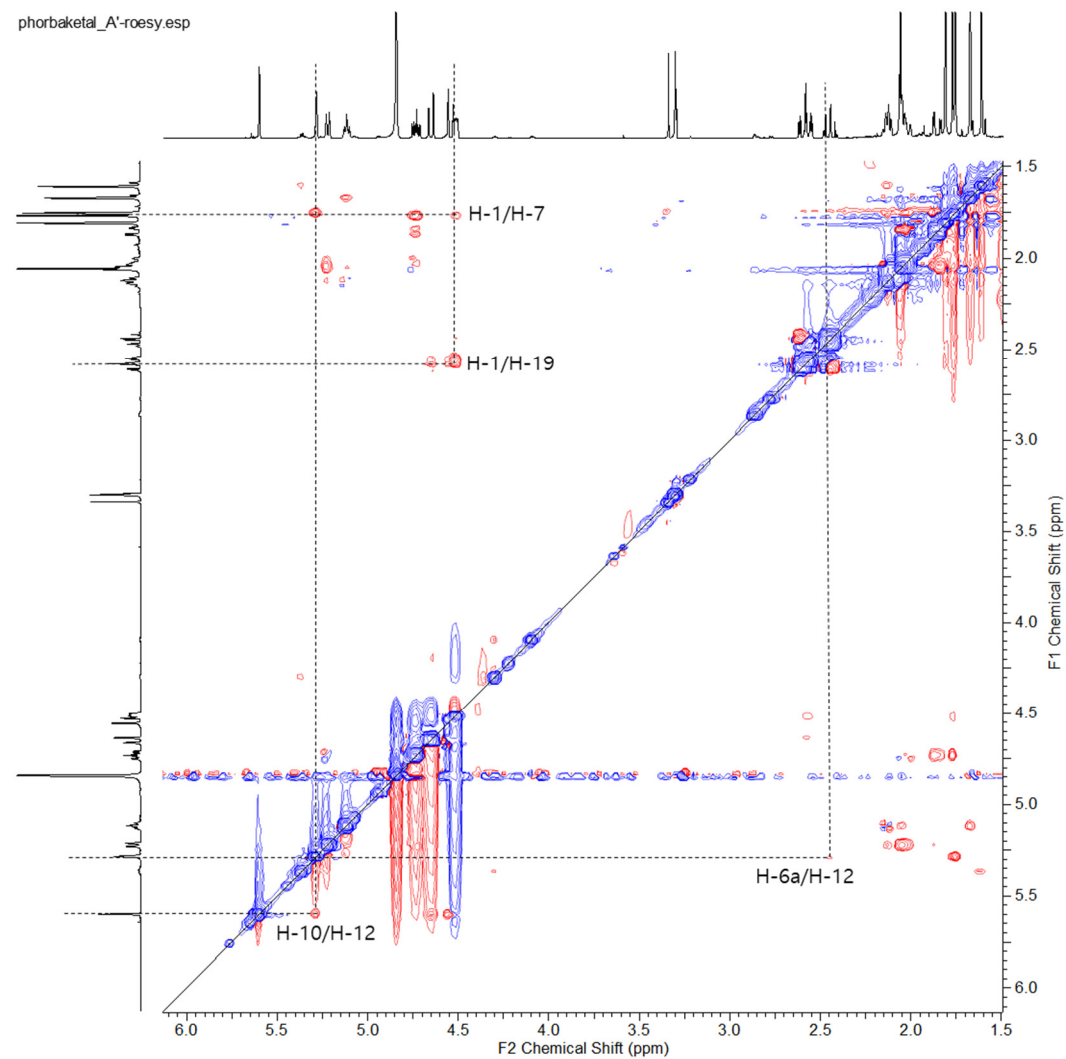

**Figure S6. The ROESY NMR spectrum of phorbaketral A acetate (2)**

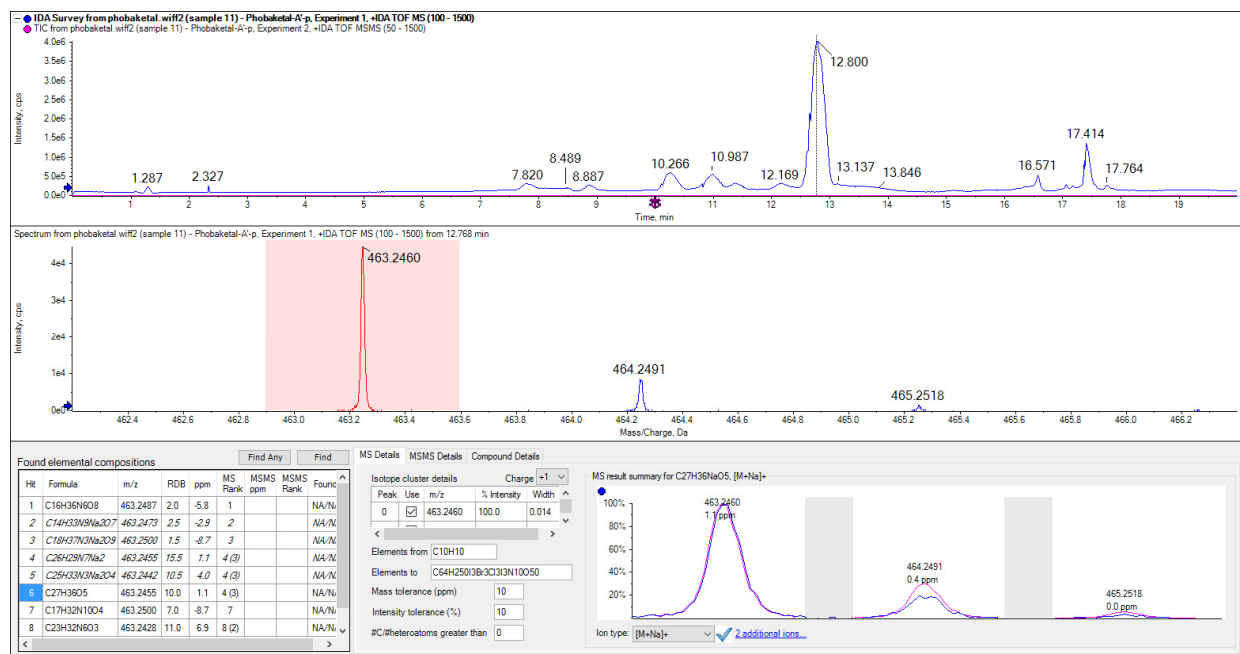

Figure S7. The HR-ESIMS of phorbaketol A acetate (2)

phorbaketal\_B'-p.esp

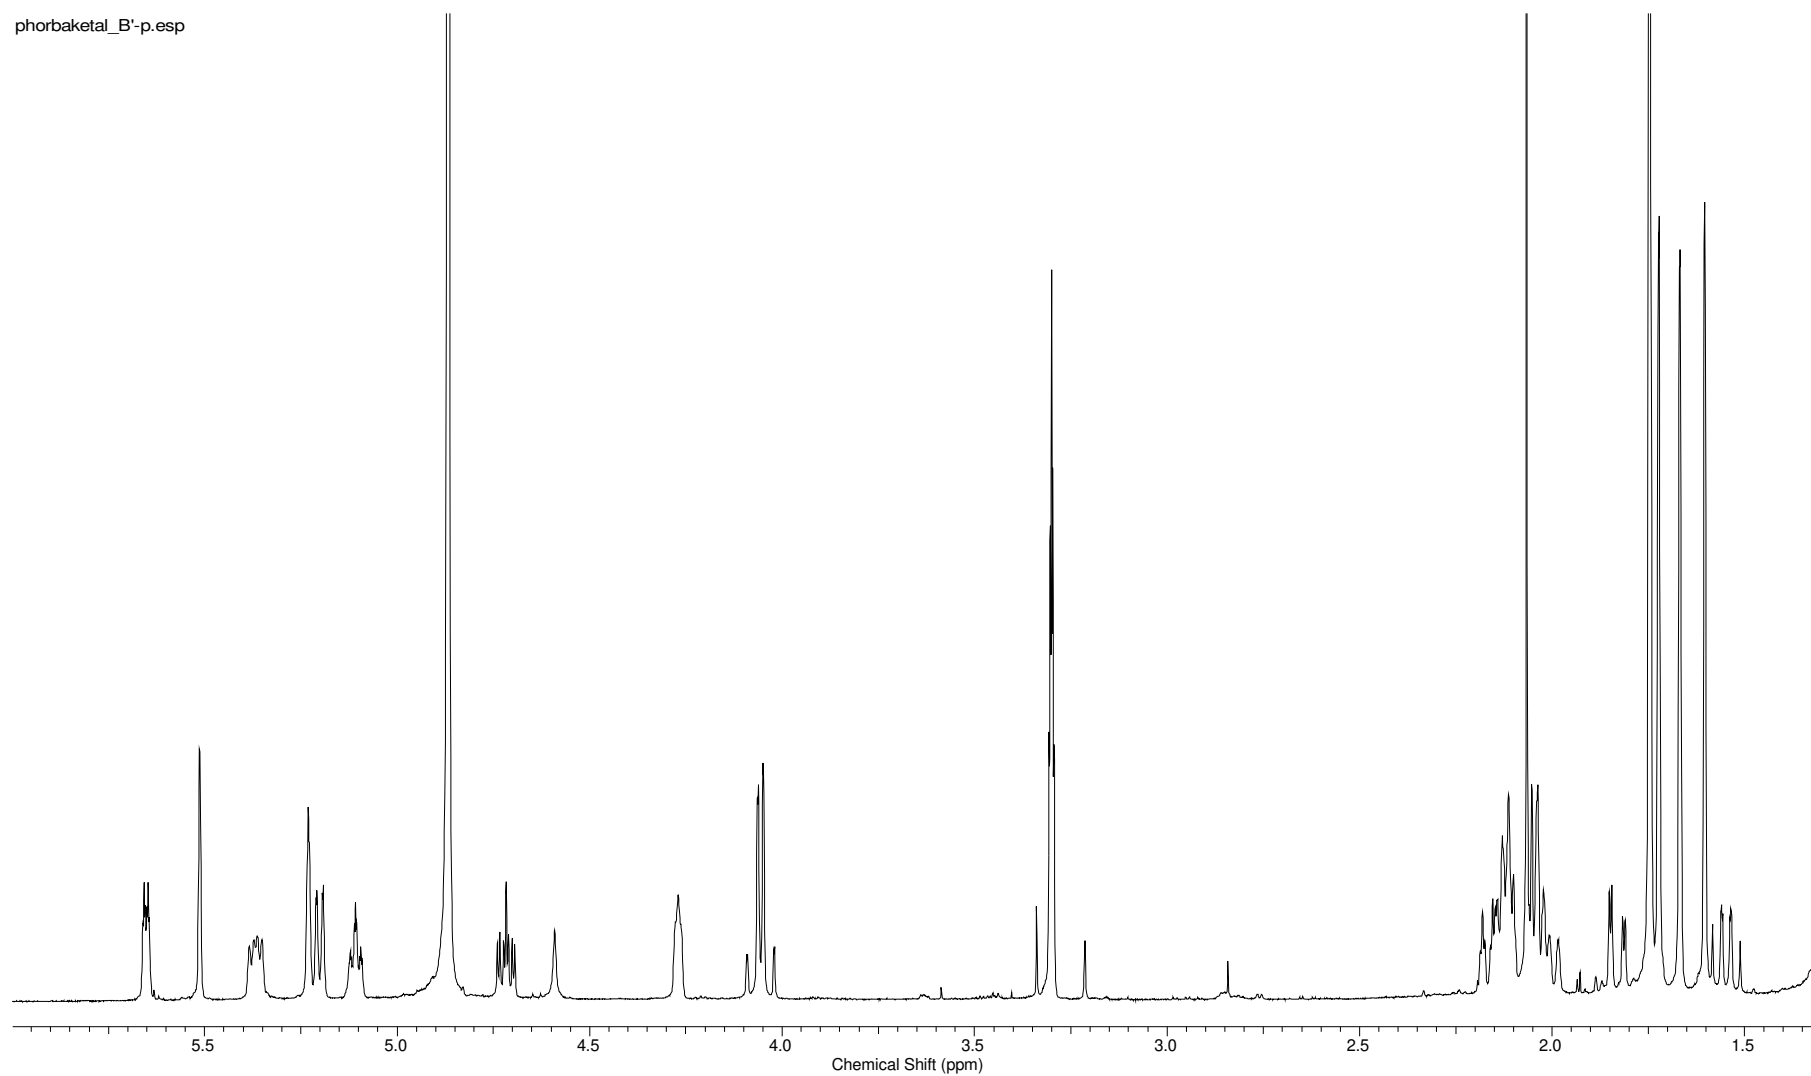

**Figure S8. The  $^1\text{H}$  NMR spectrum of phorbaketal B acetate (4)**

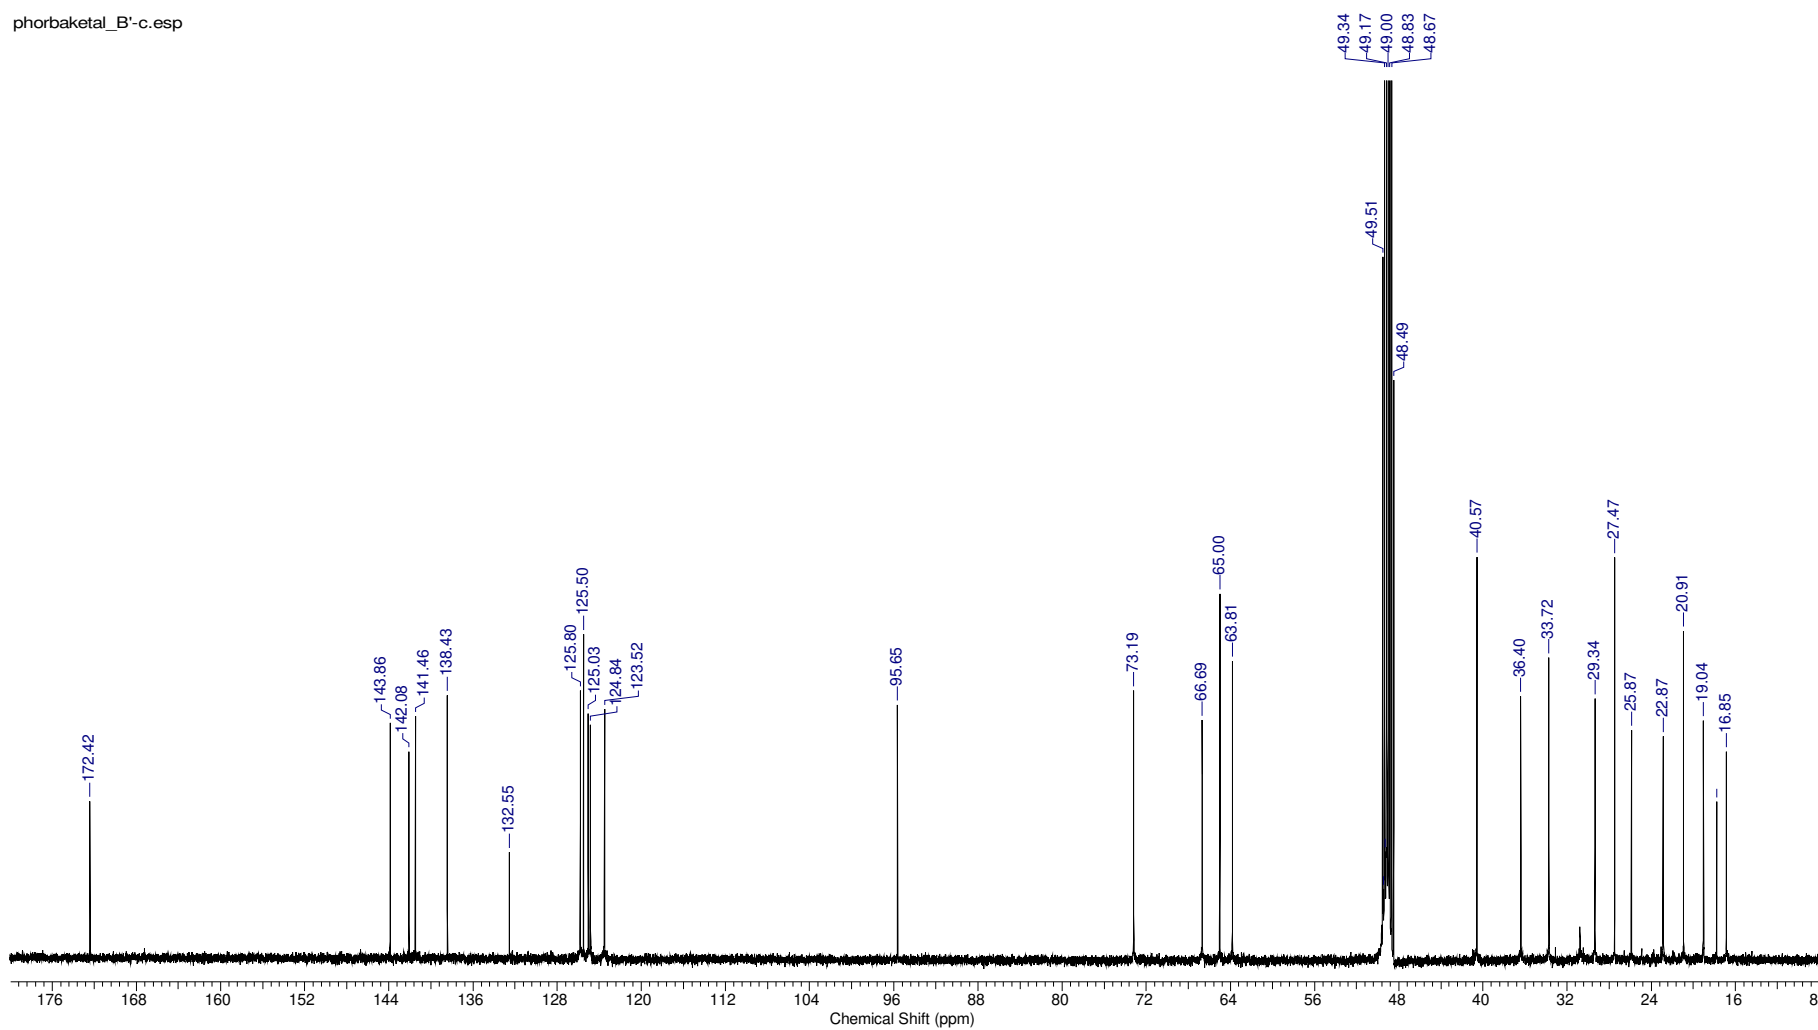

Figure S9. The  $^{13}\text{C}$  NMR spectrum of phorbaketals B acetate (4)

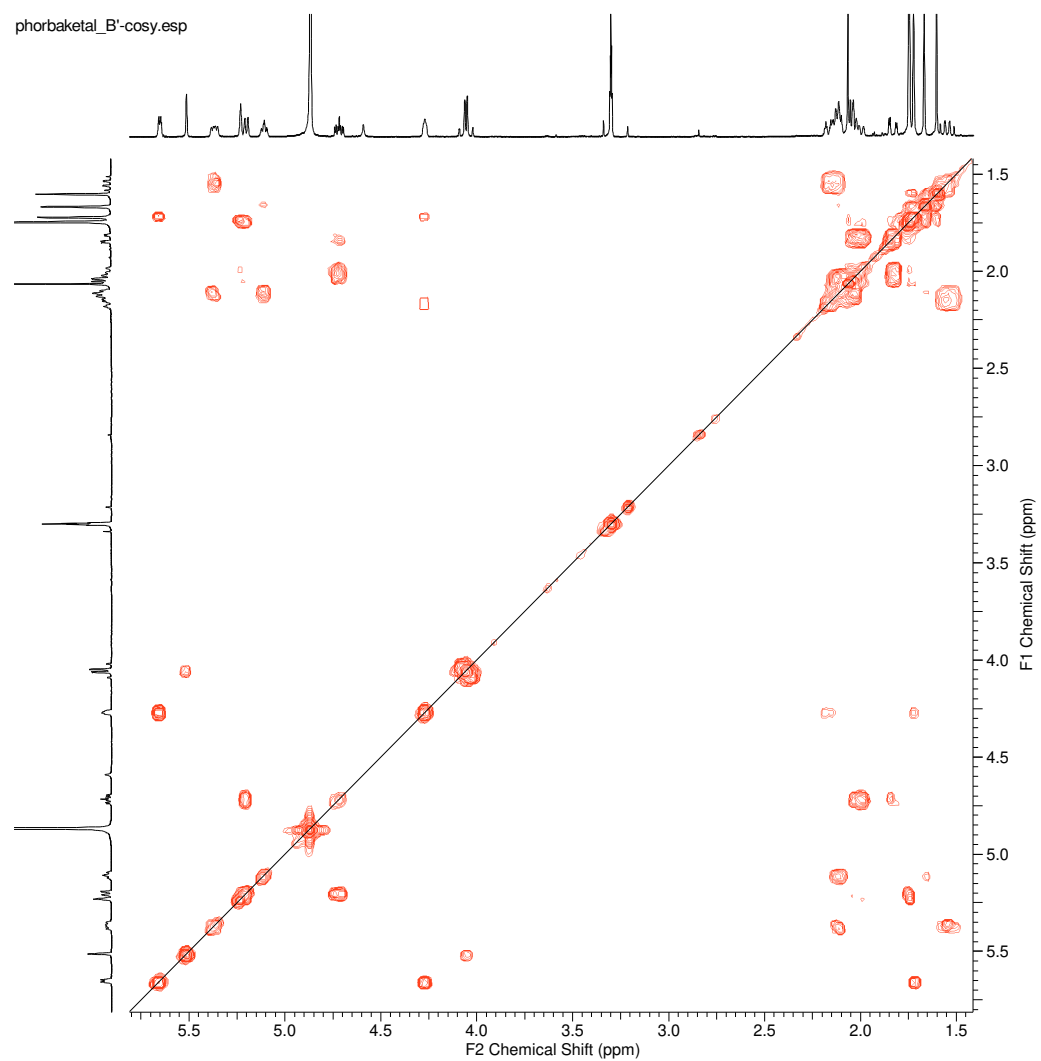

**Figure S10. The COSY NMR spectrum of phorbaketal B acetate (4)**

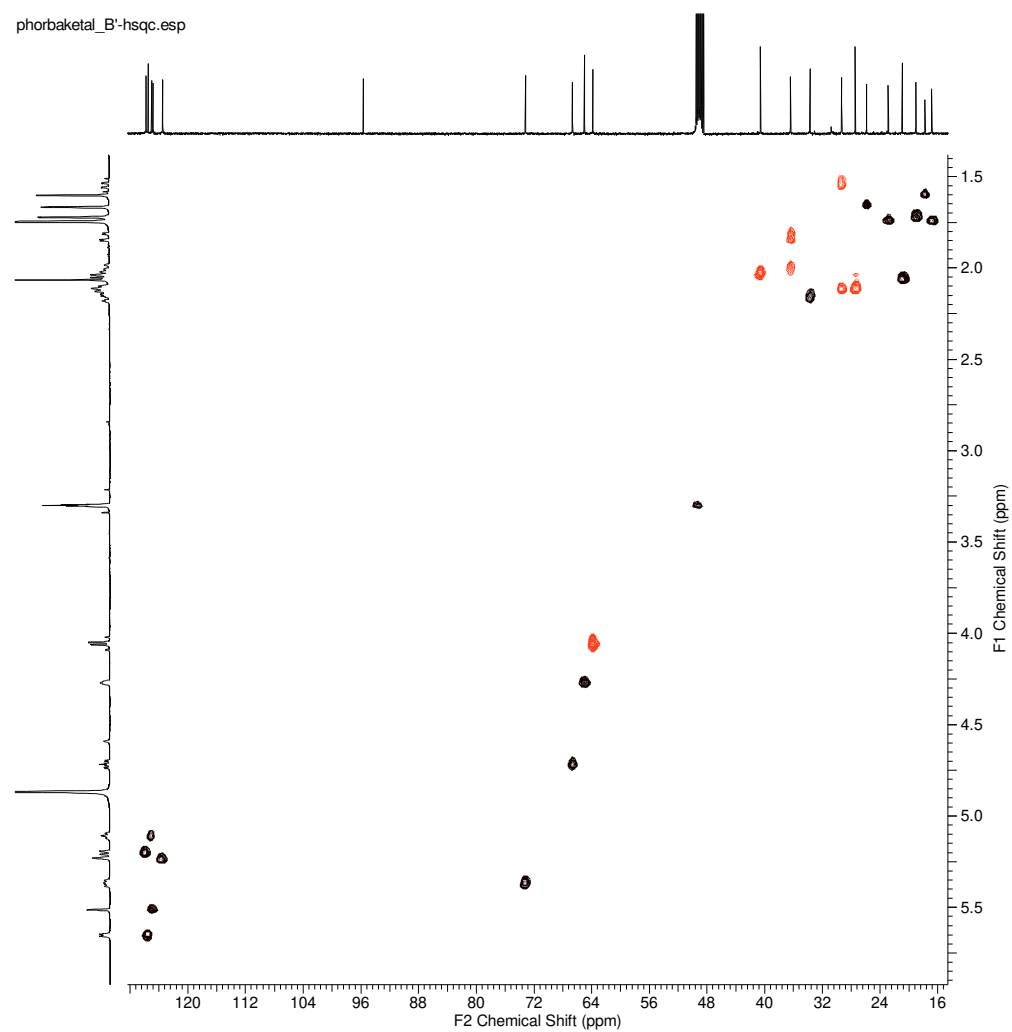

**Figure S11.** The HSQC NMR spectrum of phorbaketal B acetate (4) (red peaks: CH<sub>2</sub>; black peaks: CH)

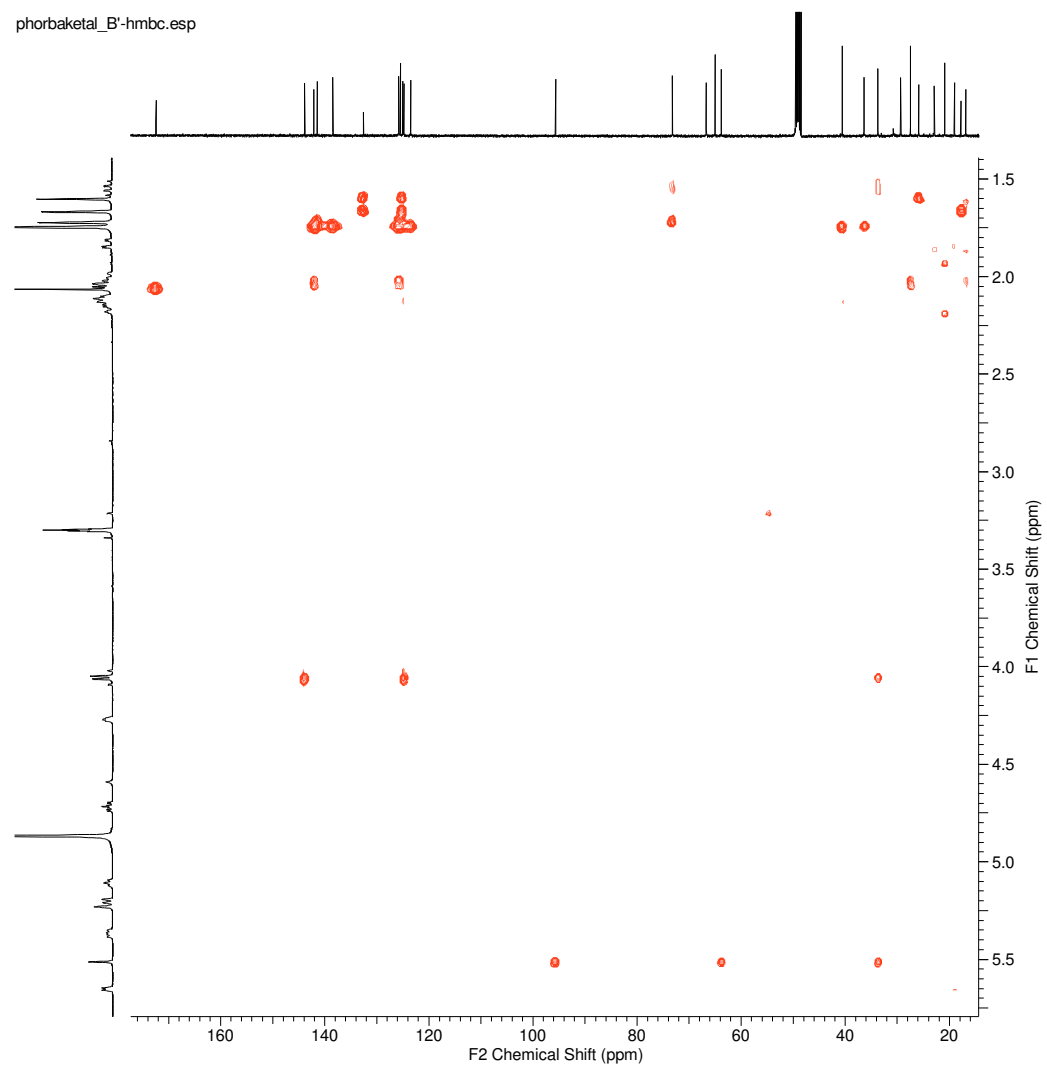

**Figure S12. The HMBC NMR spectrum of phorbaketal B acetate (4)**

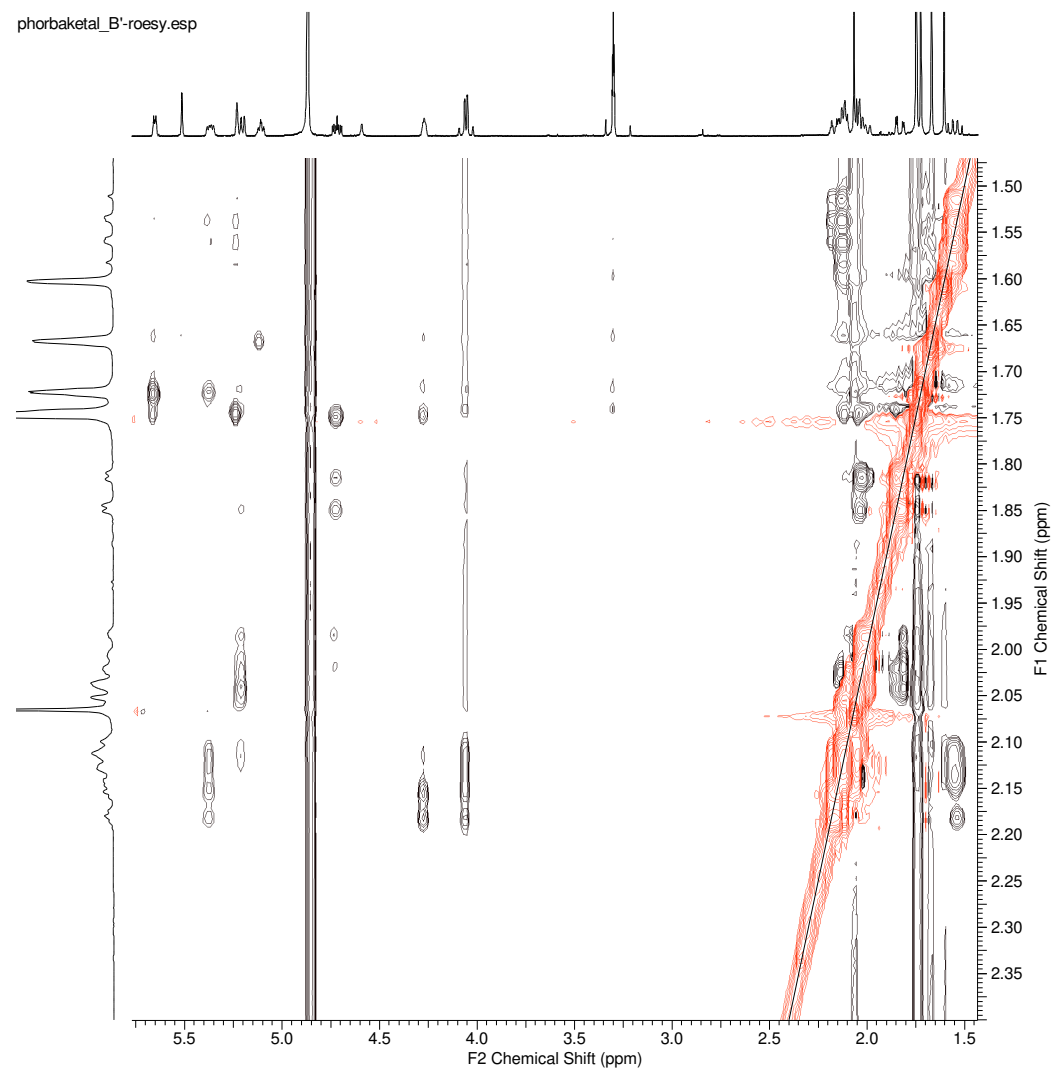

**Figure S13. The ROESY NMR spectrum of phorbaketal B acetate (4)**



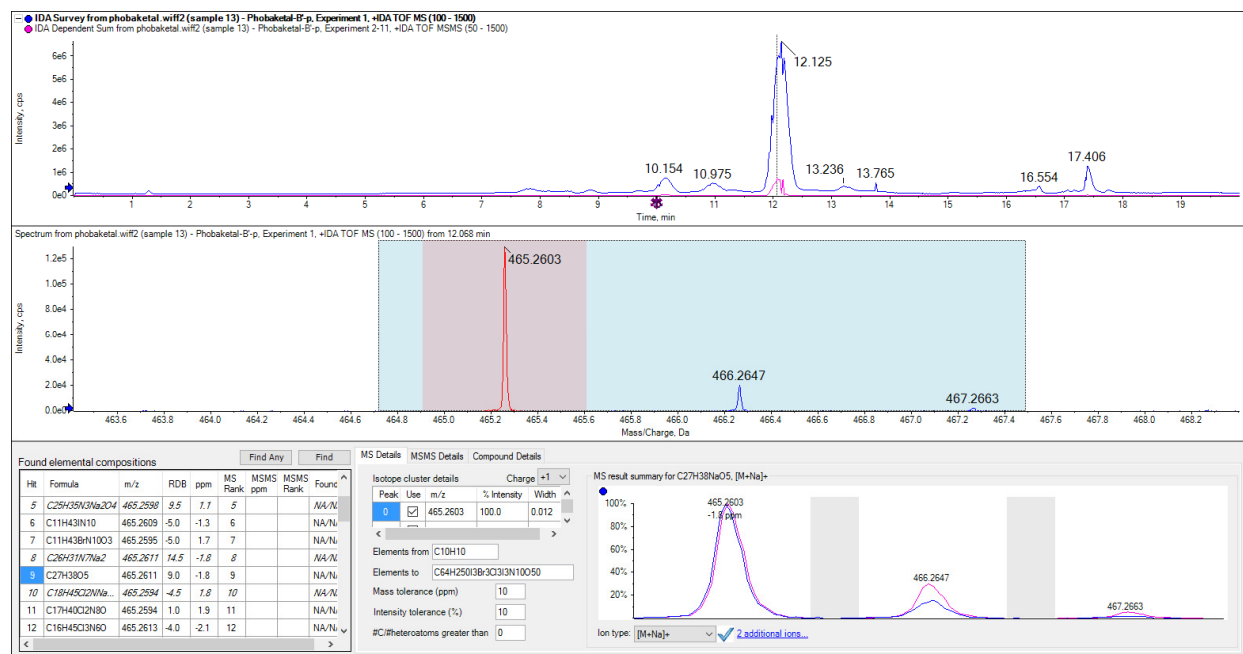

Figure S14. The HR-ESIMS of phorbaketel B acetate (4)

phorbaketal\_C'-p.esp

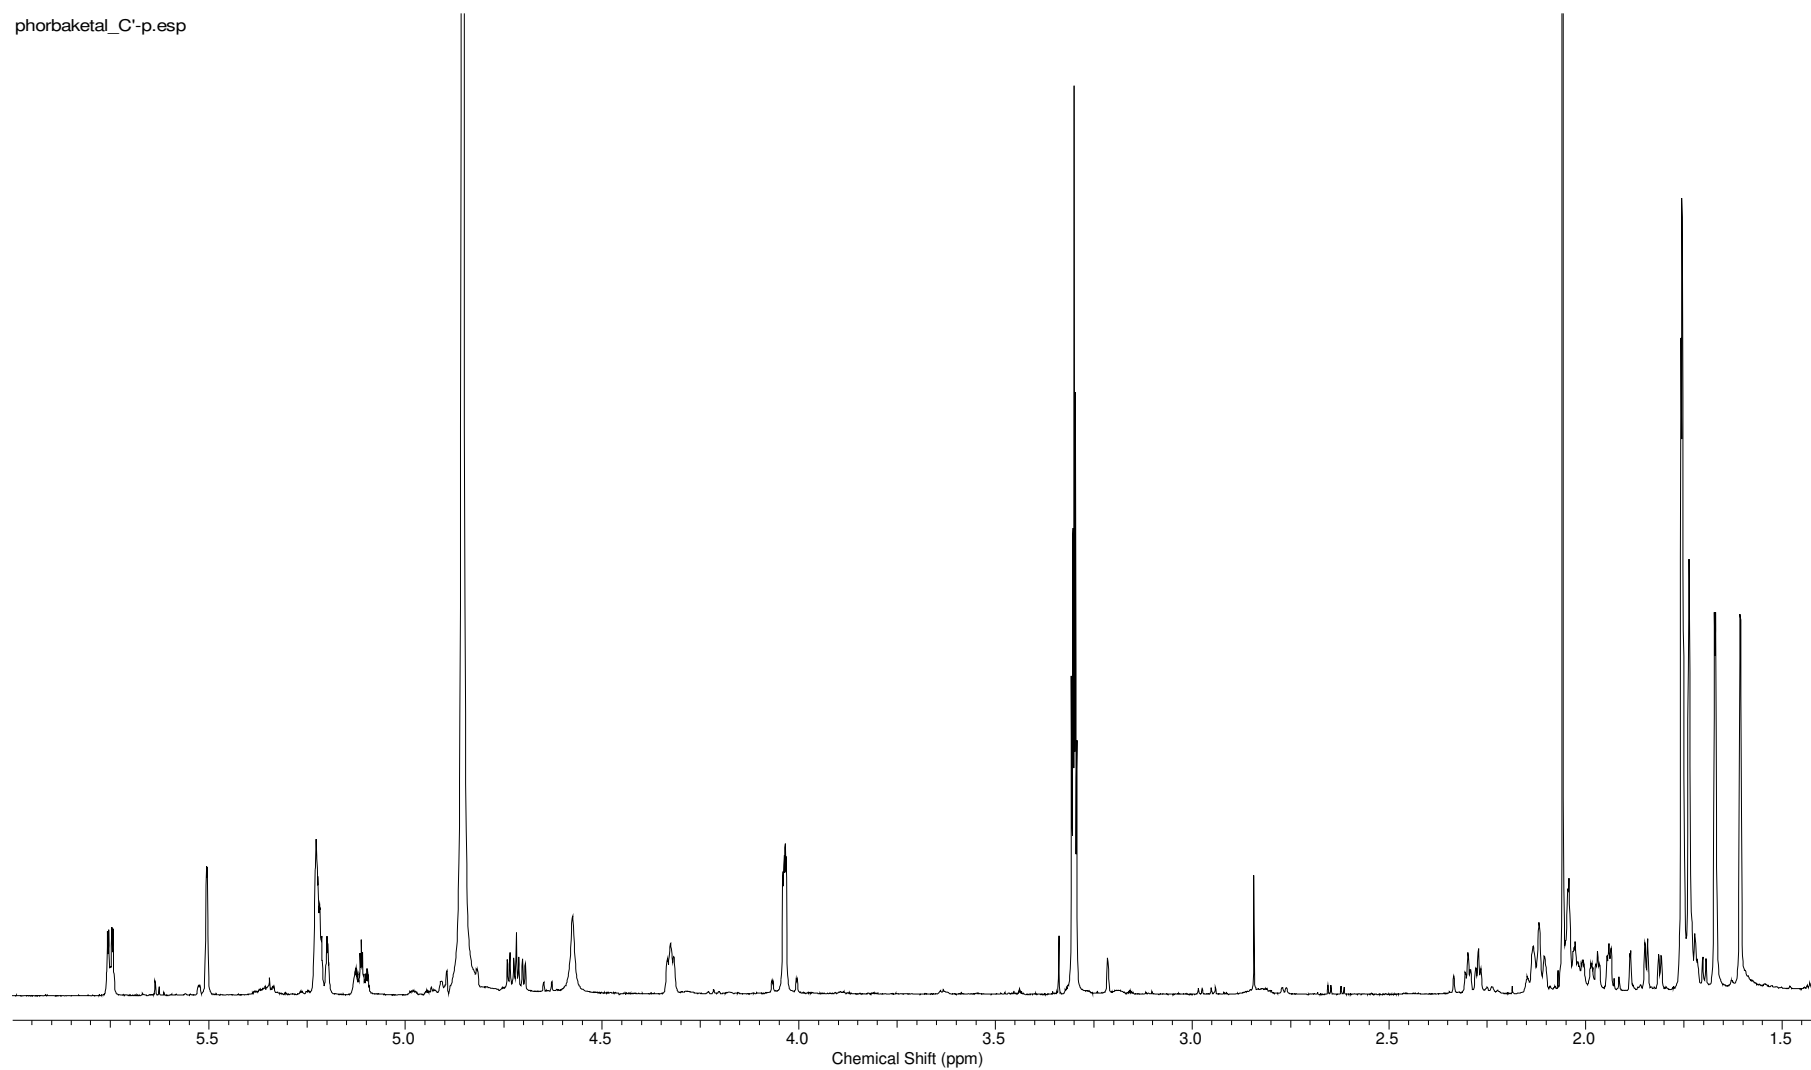

**Figure S15. The  $^1\text{H}$  NMR spectrum of phorbaketal C acetate (6)**

phorbaketral\_C'-c.esp

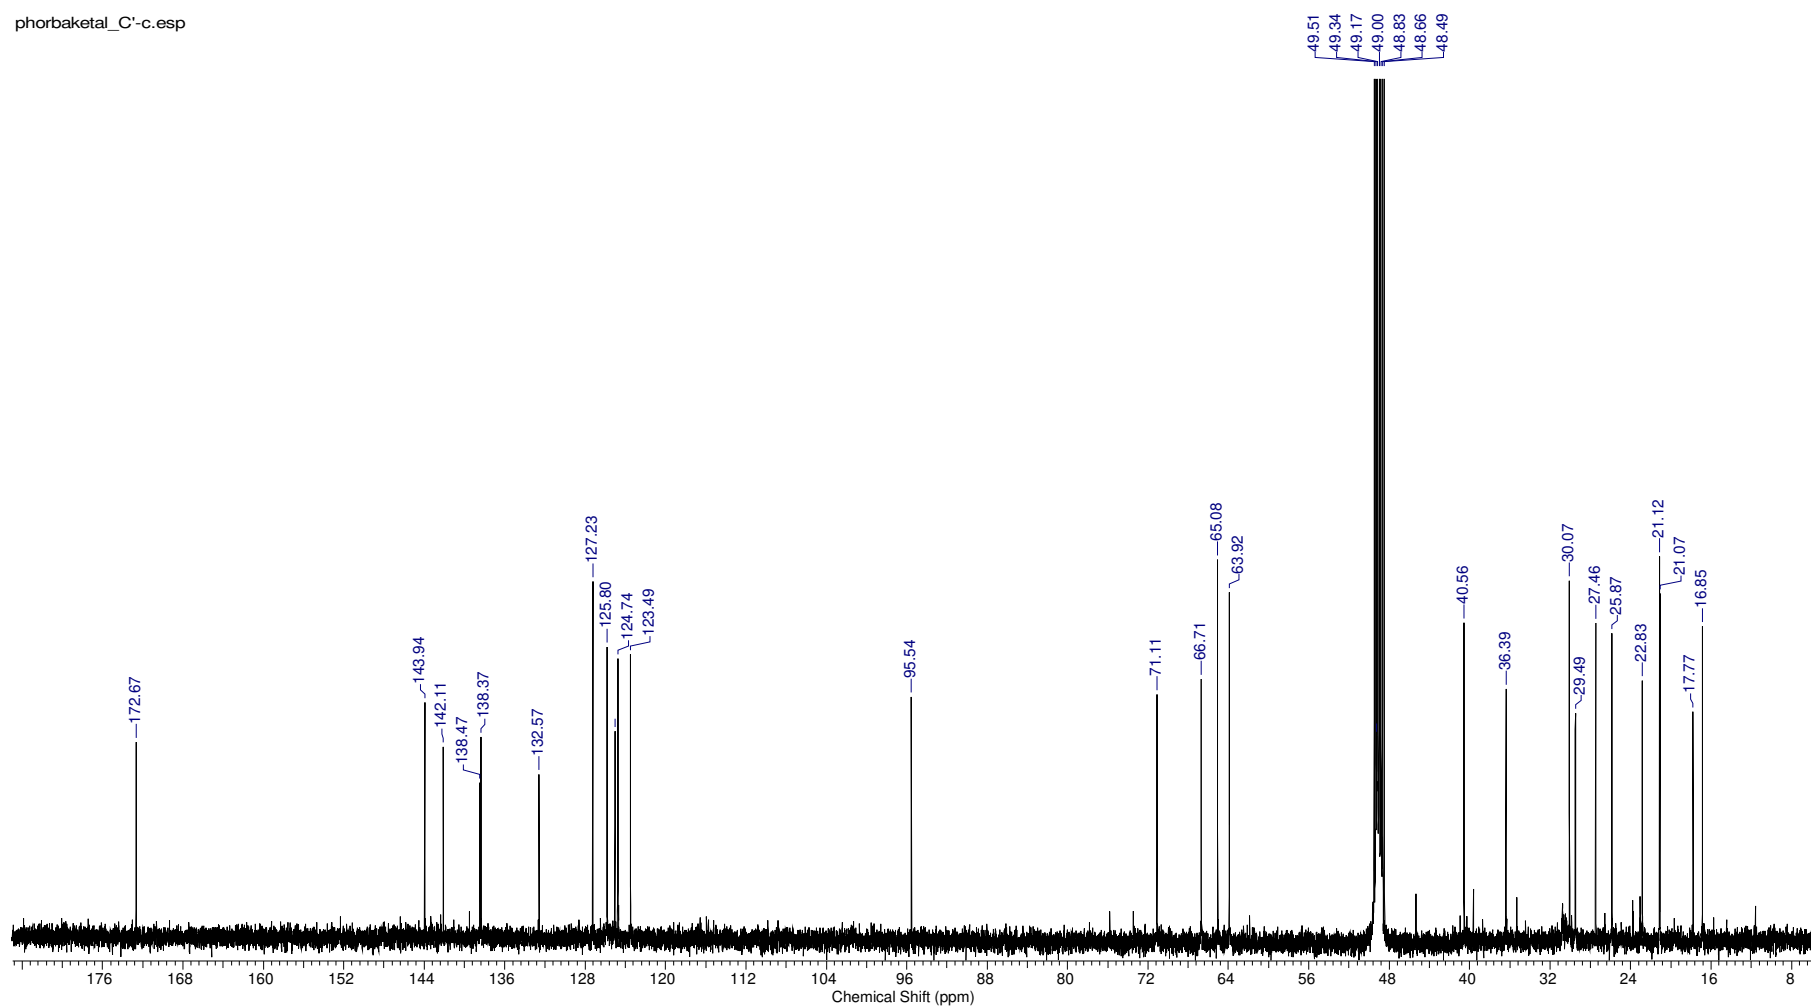

Figure S16. The  $^{13}\text{C}$  NMR spectrum of phorbaketral C acetate (6)

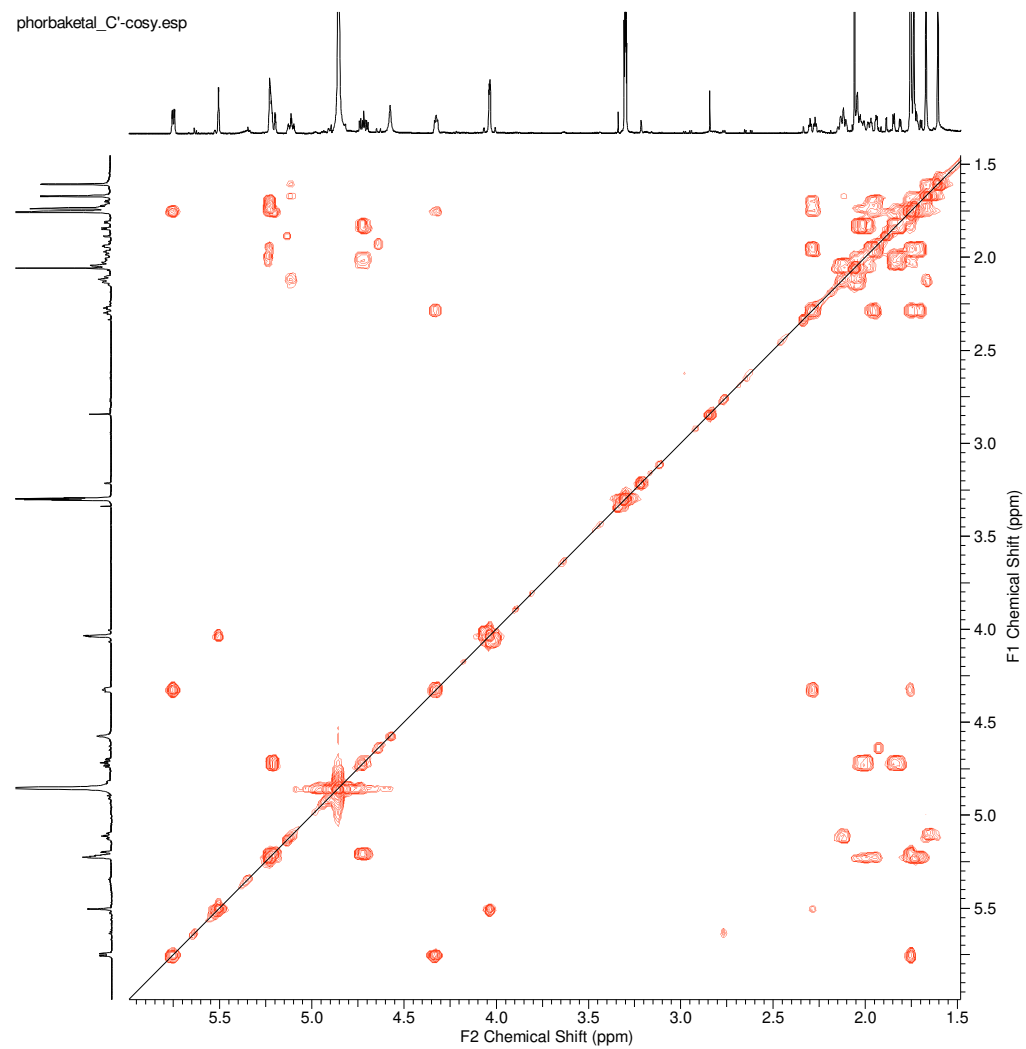

**Figure S17. The COSY NMR spectrum of phorbaketal C acetate (6)**

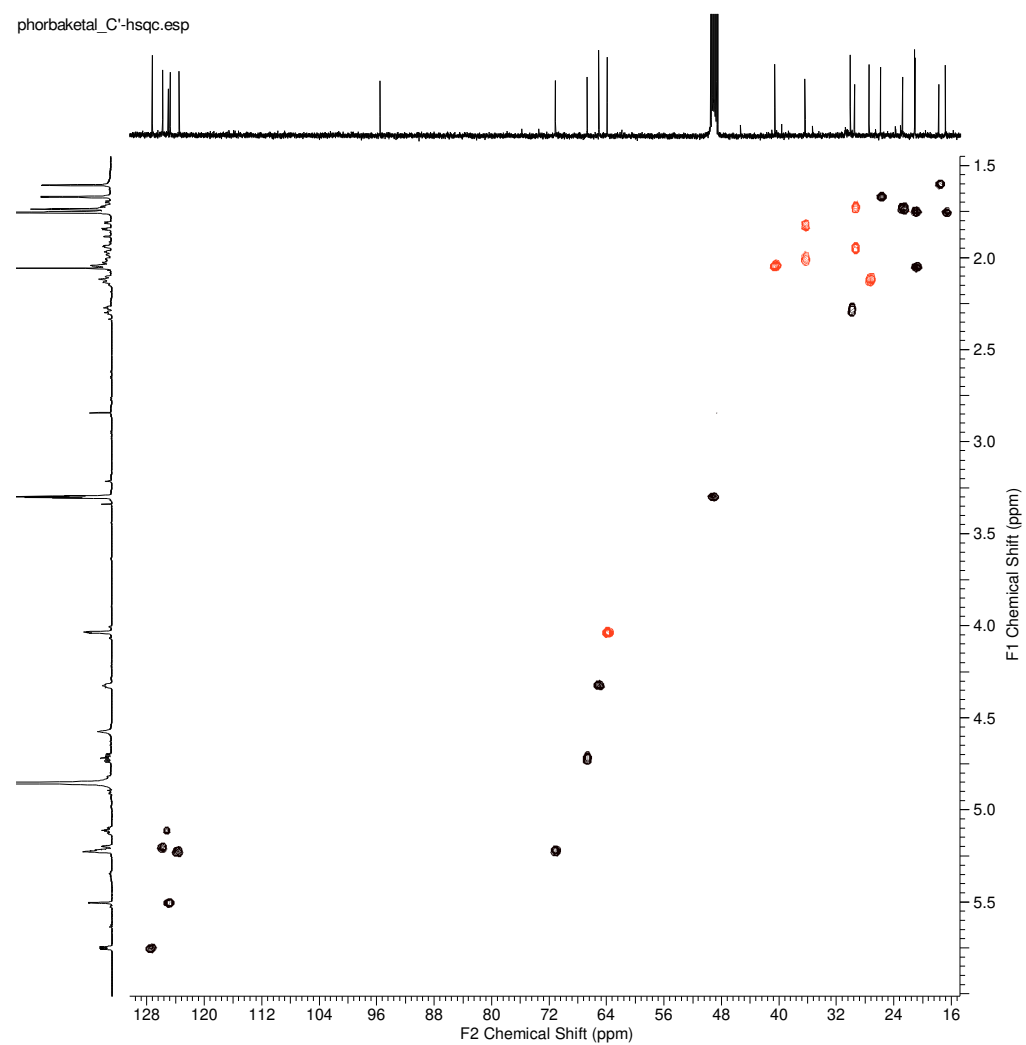

**Figure S18.** The HSQC NMR spectrum of phorbaketal C acetate (**6**) (red peaks: CH<sub>2</sub>; black peaks: CH)

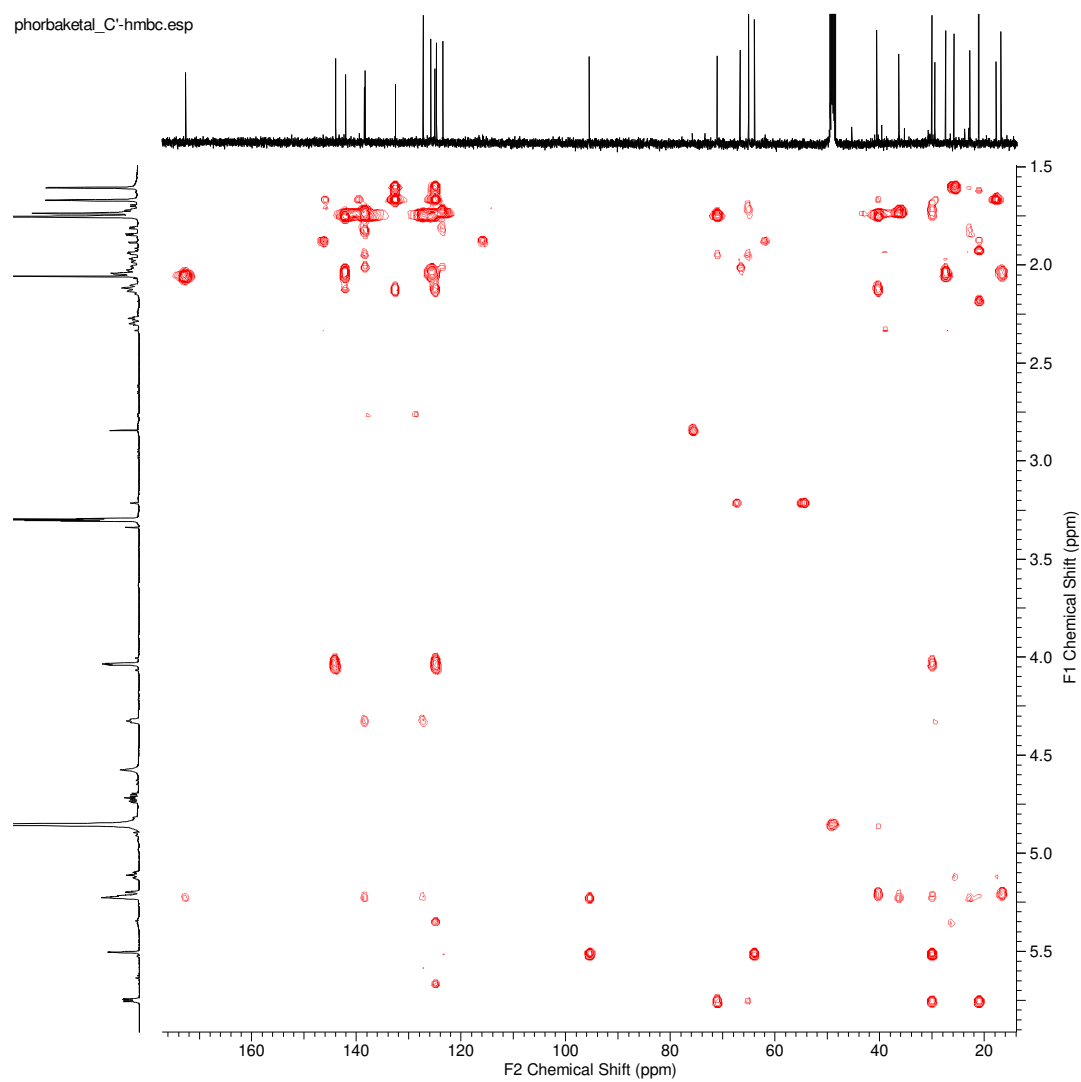

**Figure S19. The HMBC NMR spectrum of phorbaketal C acetate (6)**

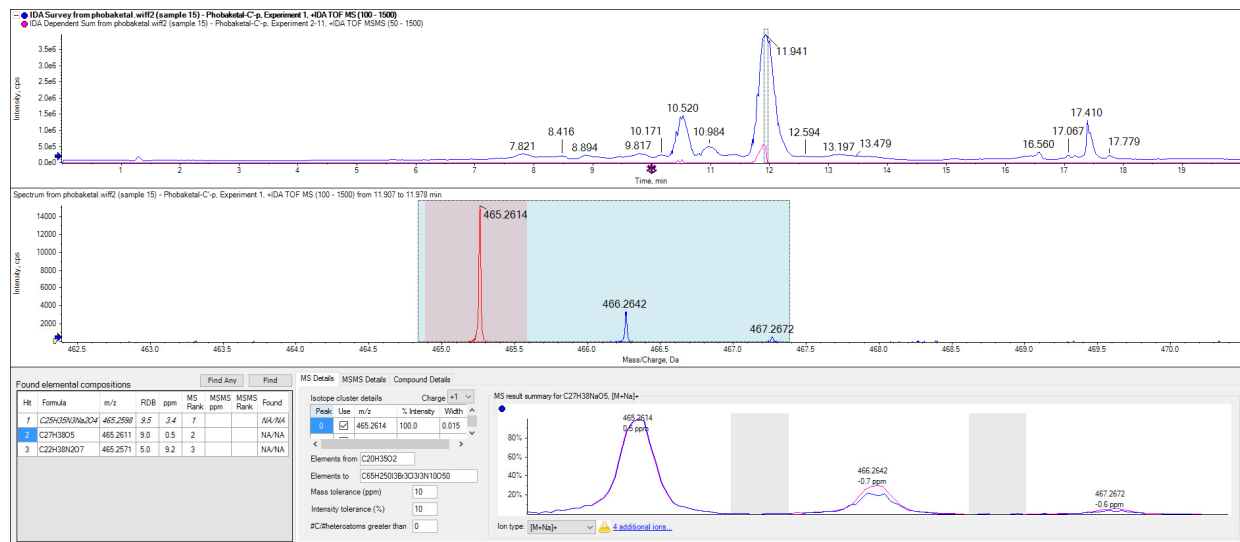

**Figure S20. The HR-ESIMS of phorbaketal C acetate (6)**

## A MSSA 6538

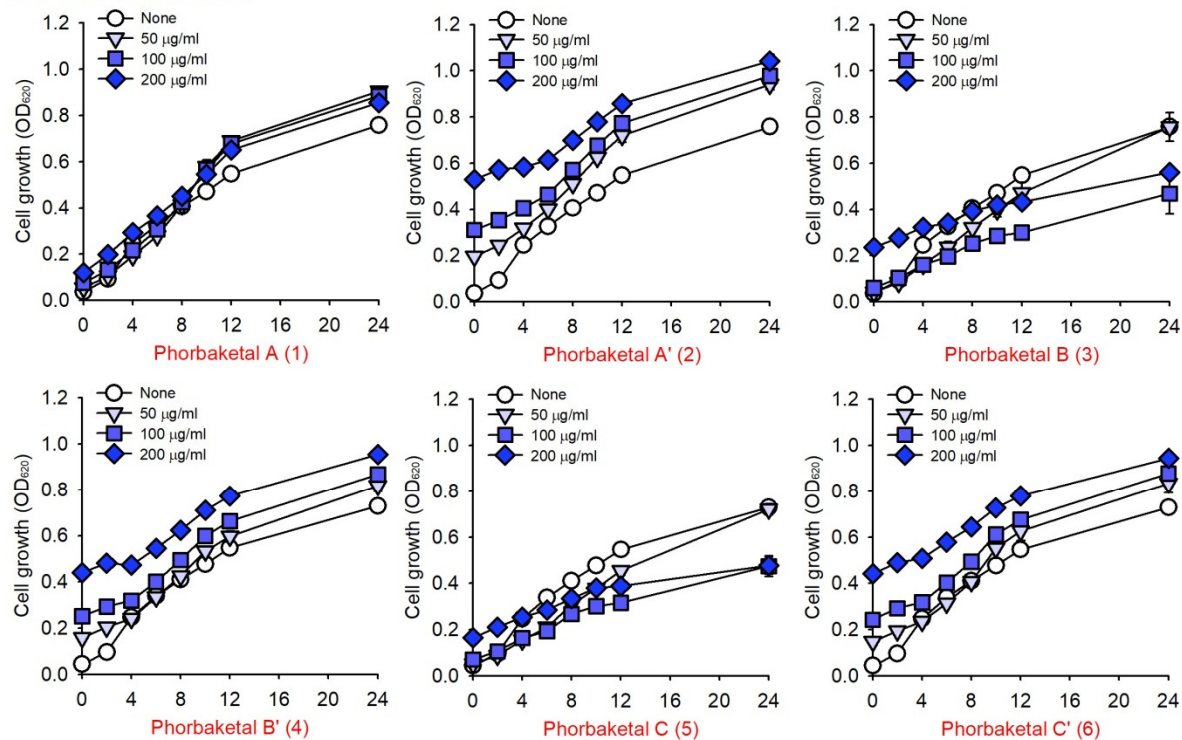

## B MRSA MW2

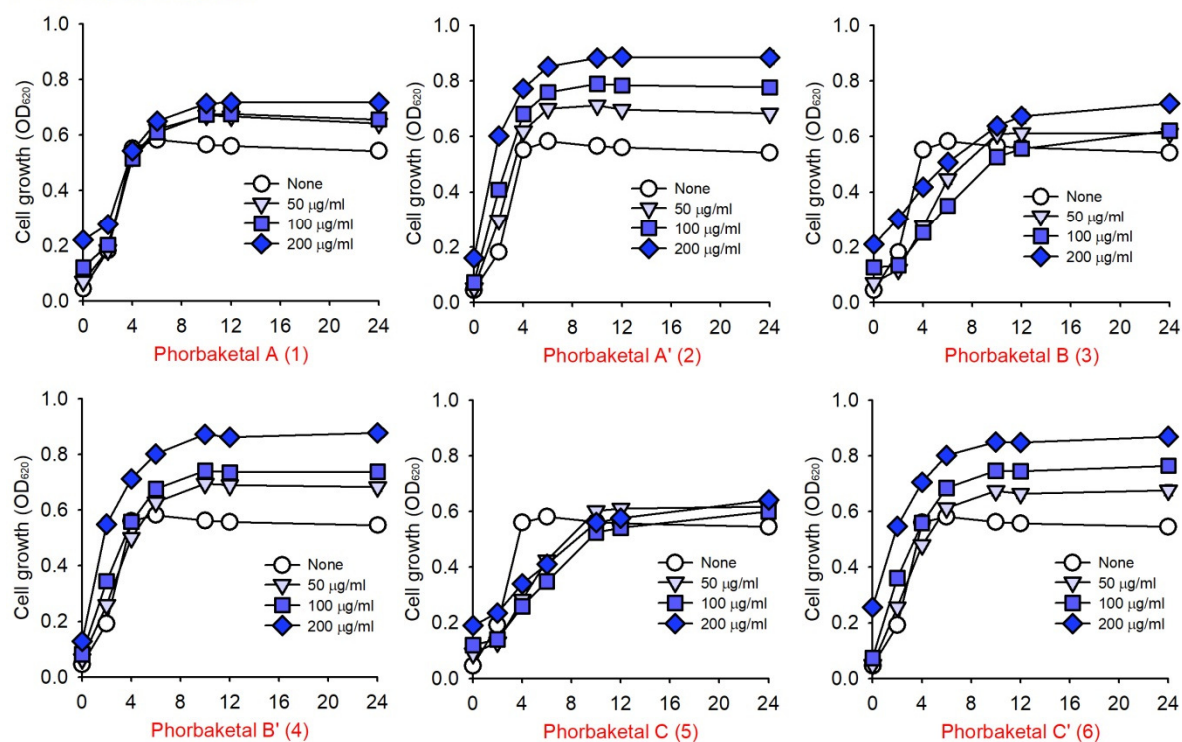

**Figure S21. Planktonic cell growth in the presence of phorbaketals.** Planktonic cell growths in the presence of different concentrations of phorbaketals were monitored in 96-well plates by measuring absorbance at 620 nm (OD<sub>620</sub>) using a spectrophotometer (UV-160, Shimadzu, Japan). Two independent cultures were used.



**Table S1. <sup>1</sup>H and <sup>13</sup>C NMR data of 2, 4 and 6 (500 and 125 MHz, respectively, methanol-*d*<sub>4</sub>)**

| 2    |            |                 |                                |                      |                | 4          |                 |                                |                        |  |  | 6          |                 |                                |                      |  |  |
|------|------------|-----------------|--------------------------------|----------------------|----------------|------------|-----------------|--------------------------------|------------------------|--|--|------------|-----------------|--------------------------------|----------------------|--|--|
| no.  | $\delta_c$ |                 | $\delta_H$ (mult, <i>J</i> Hz) |                      | HMBC           | $\delta_c$ |                 | $\delta_H$ (mult, <i>J</i> Hz) |                        |  |  | $\delta_c$ |                 | $\delta_H$ (mult, <i>J</i> Hz) |                      |  |  |
| 1    | 64.5,      | CH              | 4.51,                          | m                    | C-2, 6, 11     | 65.0,      | CH              | 4.27,                          | br t                   |  |  | 65.1,      | CH              | 4.33,                          | br t                 |  |  |
| 2    | 141.4,     | CH              | 6.69,                          | dq (5.8, 1.5)        | C-1, 4, 5, 7   | 125.5,     | CH              | 5.65,                          | dd (5.1, 1.6)          |  |  | 127.3,     | CH              | 5.75,                          | dq (5.4, 1.5)        |  |  |
| 3    | 139.6,     | C               |                                |                      |                | 141.5,     | C               |                                |                        |  |  | 138.5,     | C               |                                |                      |  |  |
| 4    | 15.9,      | CH <sub>3</sub> | 1.81,                          | br s                 | C-2, 3, 5      | 19.0,      | CH <sub>3</sub> | 1.72,                          | s                      |  |  | 21.1,      | CH <sub>3</sub> | 1.75,                          | s                    |  |  |
| 5    | 200.3,     | C               |                                |                      |                | 73.2,      | CH              | 5.37,                          | br q                   |  |  | 71.1,      | CH              | 5.23,                          | m                    |  |  |
| 6    | 38.7,      | CH <sub>2</sub> | a 2.44,                        | dd (14.2, 11.7)      | C-1, 5, 7, 8   | 29.3,      | CH <sub>2</sub> | a 1.55,                        | ddd (13.2, 11.7, 10.7) |  |  | 29.5,      | CH <sub>2</sub> | a 1.72,                        | m                    |  |  |
|      |            |                 | b 2.59,                        | m                    | C-1, 5, 7, 8   |            |                 | b 2.11,                        | m                      |  |  |            |                 | b 1.95,                        | ddd (14.4, 4.0, 3.1) |  |  |
| 7    | 35.1,      | CH              | 2.57,                          | m                    | C-8            | 33.7,      | CH              | 2.17,                          | dt (13.2, 2.9)         |  |  | 30.1,      | CH              | 2.28,                          | dt (13.2, 3.1)       |  |  |
| 8    | 138.8,     | C               |                                |                      |                | 143.9,     | C               |                                |                        |  |  | 144.0,     | C               |                                |                      |  |  |
| 9    | 65.7,      | CH <sub>2</sub> | a 4.54,                        | dd (14.3, 1.5)       | C-7, 8, 10, 1' | 63.8,      | CH <sub>2</sub> | a 4.03,                        | dd (14.2, 1.5)         |  |  | 63.9,      | CH <sub>2</sub> | a 4.02,                        | dd (14.1, 1.5)       |  |  |
|      |            |                 | b 4.65,                        | dd (14.3, 1.5)       | C-7, 8, 10, 1' |            |                 | b 4.08,                        | dd (14.2, 1.5)         |  |  |            |                 | b 4.05,                        | dd (14.1, 1.5)       |  |  |
| 10   | 127.9,     | CH              | 5.60,                          | br s                 | C-7, 9, 11     | 124.8,     | CH              | 5.51,                          | br d                   |  |  | 124.7,     | CH              | 5.50,                          | br q                 |  |  |
| 11   | 95.9,      | C               |                                |                      |                | 95.7,      | C               |                                |                        |  |  | 95.5,      | C               |                                |                      |  |  |
| 12   | 122.6,     | CH              | 5.28,                          | m                    | C-11, 14, 15   | 123.5,     | CH              | 5.23,                          | m                      |  |  | 123.5,     | CH              | 5.23,                          | m                    |  |  |
| 13   | 139.1,     | C               |                                |                      |                | 138.4,     | C               |                                |                        |  |  | 138.3,     | C               |                                |                      |  |  |
| 14   | 22.9,      | CH <sub>3</sub> | 1.75,                          | s                    | C-12, 13, 15   | 22.9,      | CH <sub>3</sub> | 1.75,                          | s                      |  |  | 22.8,      | CH <sub>3</sub> | 1.74,                          | s                    |  |  |
| 15   | 36.3,      | CH <sub>2</sub> | a 1.85,                        | dd (17.4, 3.4)       | C-12, 13       | 36.4,      | CH <sub>2</sub> | a 1.83,                        | dd (17.3, 3.3)         |  |  | 36.4,      | CH <sub>2</sub> | a 1.83,                        | br d (3.3)           |  |  |
|      |            |                 | b 2.01,                        | br d                 | C-12, 13       |            |                 | b 1.99,                        | br d (11.1)            |  |  |            |                 | b 2.00,                        | br d (11.0)          |  |  |
| 16   | 66.9,      | CH              | 4.73,                          | ddd (11.3, 8.2, 3.4) | C-11, 17, 18   | 66.7,      | CH              | 4.72,                          | ddd (11.1, 8.2, 3.3)   |  |  | 66.7,      | CH              | 4.75,                          | ddd (11.0, 8.2, 3.3) |  |  |
| 17   | 125.7,     | CH              | 5.22,                          | dq (8.2, 1.2)        | C-15, 19, 20   | 125.8,     | CH              | 5.20,                          | dq (8.2, 1.2)          |  |  | 125.8,     | CH              | 5.21,                          | br d (8.2)           |  |  |
| 18   | 142.0,     | C               |                                |                      |                | 142.1,     | C               |                                |                        |  |  | 142.1,     | C               |                                |                      |  |  |
| 19   | 16.9,      | CH <sub>3</sub> | 1.77,                          | s                    | C-17, 18, 20   | 16.9,      | CH <sub>3</sub> | 1.75,                          | s                      |  |  | 16.9,      | CH <sub>3</sub> | 1.76,                          | s                    |  |  |
| 20   | 40.6,      | CH <sub>2</sub> | 2.05,                          | m                    | C-18           | 40.6,      | CH <sub>2</sub> | 2.05,                          | m                      |  |  | 40.6,      | CH <sub>2</sub> | 2.04,                          | m                    |  |  |
| 21   | 27.5,      | CH <sub>2</sub> | 2.12,                          | m                    | C-20, 22, 23   | 27.5,      | CH <sub>2</sub> | 2.11,                          | m                      |  |  | 27.5,      | CH <sub>2</sub> | 2.12,                          | m                    |  |  |
| 22   | 125.0,     | CH              | 5.12,                          | m                    | C-24, 25       | 125.0,     | CH              | 5.11,                          | br t (7.0)             |  |  | 125.0,     | CH              | 5.11,                          | br t (6.9)           |  |  |
| 23   | 132.6,     | C               |                                |                      |                | 132.6,     | C               |                                |                        |  |  | 132.6,     | C               |                                |                      |  |  |
| 24   | 25.9,      | CH <sub>3</sub> | 1.67,                          | s                    | C-22, 23, 25   | 25.9,      | CH <sub>3</sub> | 1.67,                          | s                      |  |  | 25.9,      | CH <sub>3</sub> | 1.67,                          | s                    |  |  |
| 25   | 17.8,      | CH <sub>3</sub> | 1.61,                          | s                    | C-22, 23, 24   | 17.8,      | CH <sub>3</sub> | 1.61,                          | s                      |  |  | 17.8,      | CH <sub>3</sub> | 1.61,                          | s                    |  |  |
| O-Ac |            |                 |                                |                      |                |            |                 |                                |                        |  |  |            |                 |                                |                      |  |  |
| 1'   | 172.3,     | C               |                                |                      |                | 172.4,     | C               |                                |                        |  |  | 172.6,     | C               |                                |                      |  |  |
| 2'   | 20.7,      | CH <sub>3</sub> | 2.06,                          | s                    | C-9, 1'        | 20.9,      | CH <sub>3</sub> | 2.06,                          | s                      |  |  | 21.1,      | CH <sub>3</sub> | 2.06,                          | s                    |  |  |

**Table S2. Sequences of the primers used for qRT-PCR.**

| Gene            | Name                               | Primer                                                                                                       |
|-----------------|------------------------------------|--------------------------------------------------------------------------------------------------------------|
| <i>16S rRNA</i> | A component of ribosomes           | Forward 5'-TGT TTG ACG ATG TTT GAG CA-3'<br>Reverse 5'-CCT TCC TCC AGT TCA GAT GC -3'                        |
| <i>agrA</i>     | Quorum-sensing regulator A         | Forward 5'-TGA TAA TCC TTA TGA GGT GCT T-3'<br>Reverse 5'-CAC TGT GAC TCG TAA CGA AAA-3'                     |
| <i>arlR</i>     | Response regulator                 | Forward 5'-TTA CGG TGC AGG CGA TTA TAT AG-3'<br>Reverse 5'-TAC CGT TGA CAT CGA TAA TAT CC-3'                 |
| <i>aur</i>      | Zinc metalloproteinase aureolysin  | Forward 5'-ACC GTG TGT TAA TTC GTG TGC TA-3'<br>Reverse 5'-ATG GTC GCA CAT TCA CAA GTT T-3'                  |
| <i>hla</i>      | $\alpha$ -Hemolysin                | Forward 5'-CGG CAC ATT TGC ACC AAT AAG GC-3'<br>Reverse 5'-GGT TTA GCC TGG CCT TCA GC-3'                     |
| <i>icaA</i>     | Intercellular adhesion A           | Forward 5'-TGA ACC GCT TGC CAT GTG-3'<br>Reverse 5'-CAC GCG TTG CTT CCA AAG A-3'                             |
| <i>nuc1</i>     | Nuclease                           | Forward 5'-CAC CTG AAA CAA AGC ATC CTA A-3'<br>Reverse 5'-TAT ACG CTA AGC CAC GTC CAT-3'                     |
| <i>RNA III</i>  | Transcriptional regulator          | Forward 5'-ATC GAC ACA GTG AAC AAA TTC AC-3'<br>Reverse 5'-CTC TAC TAG CAA ATG TTA CTC AC-3'                 |
| <i>saeR</i>     | Response regulator                 | Forward 5'-GCC TTA ACT TTA GGT GCA GAT GAC TAT GTC-3'<br>Reverse 5'-CGA CAG TTG TTC AAC TGG TTG ATG ATG G-3' |
| <i>sarA</i>     | Transcriptional regulator          | Forward 5'-GAG TTG TTA TCA ATG GTC-3'<br>Reverse 5'-GTT TGC TTC AGT GAT TCG-3'                               |
| <i>sarZ</i>     | HTH-type transcriptional regulator | Forward 5'-CCT ATA CTG GTT ACA TTG TTT TAA TGG-3'<br>Reverse 5'-TGG TGT CAG TGT TCC AGA ATC-3'               |
| <i>seb</i>      | Enterotoxin B                      | Forward 5'-TGT TCG GGT ATT TGA AGA TGG -3'<br>Reverse 5'-CGT TTC ATA AGG CGA GTT GTT-3'                      |
| <i>sigB</i>     | RNA Polymerase sigma factor        | Forward 5'-AAG TGA TTC GTA AGG ACG TCT-3'<br>Reverse 5'-TCG ATA ACT ATA ACC AAA GCC T-3'                     |
| <i>spa</i>      | Protein A                          | Forward 5'-ACC AGA AAC TGG TGA AGA AAA TCC-3'<br>Reverse 5'-TAA CGC TGC ACC TAA GGC TAA TG-3'                |
